# Supplementary material for: Palladium-catalyzed one-pot synthesis of diazoles via tert-butyl isocyanide insertion
Source: Royal Society of Chemistry journal article supplement (doi:10.1039/c5ob01328c), 2015-01-01

Supporting Information

**Palladium-Catalyzed One-Pot Synthesis of diazoles via *tert*-Butyl  
Isocyanide Insertion**

Xiang-Yuan Fan, Xiao Jiang, Jin-Mei Wang, Zhen-Bang Chen, Yong-Ming Zhu\*

*College of Pharmaceutical Sciences, Soochow University, Suzhou, 215123, China*

*E-mail: zhuyongming@suda.edu.cn; Fax: (+86)-512-67166591*

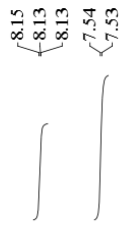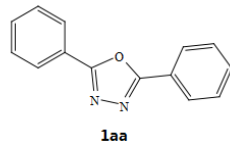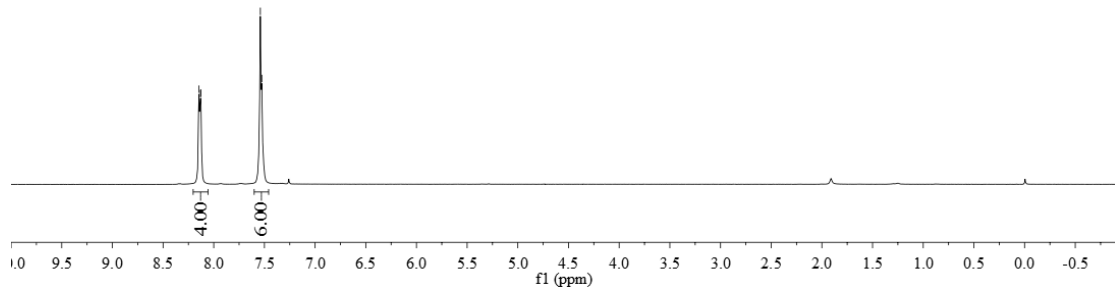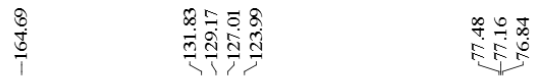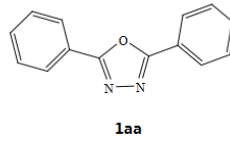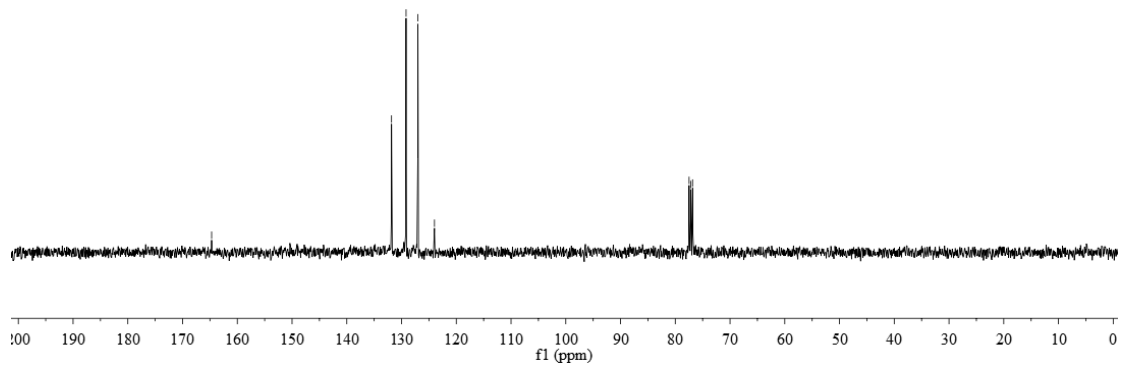

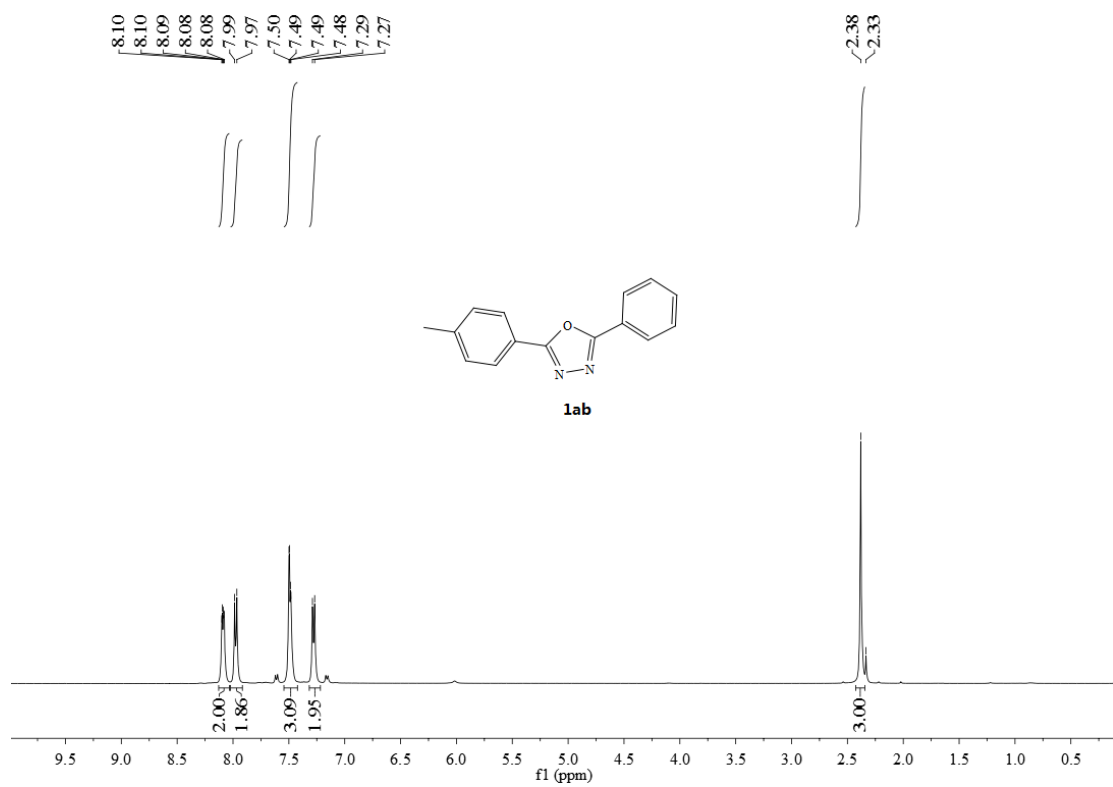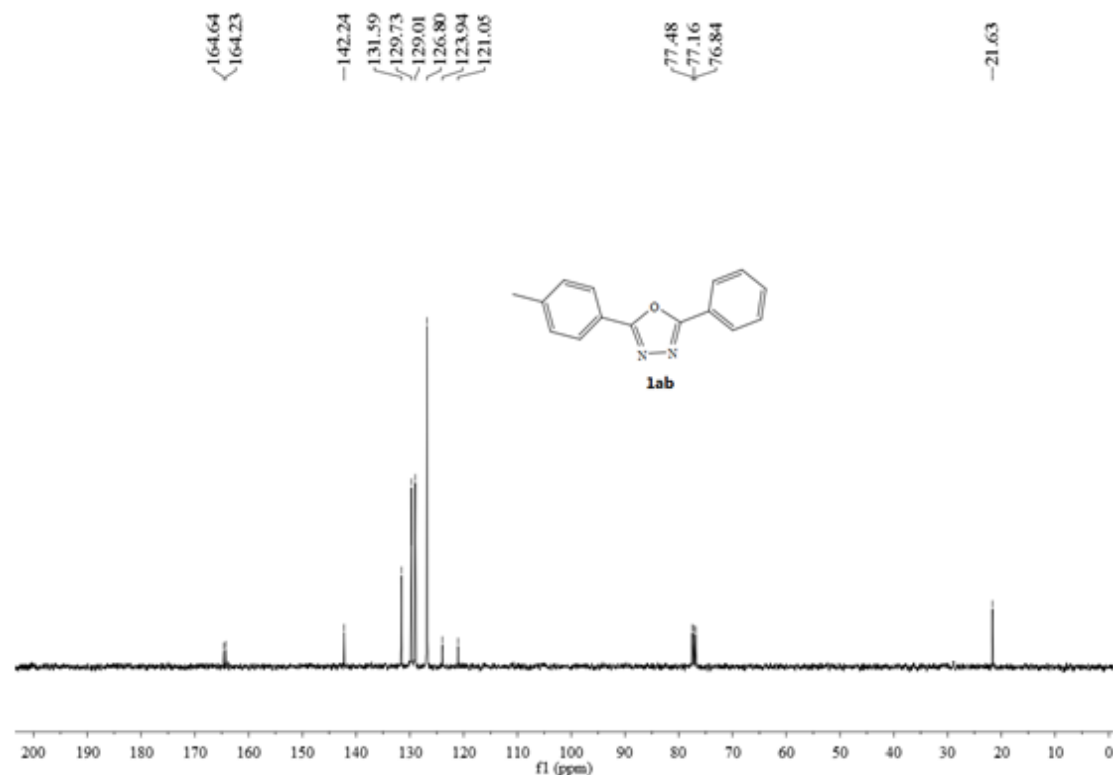

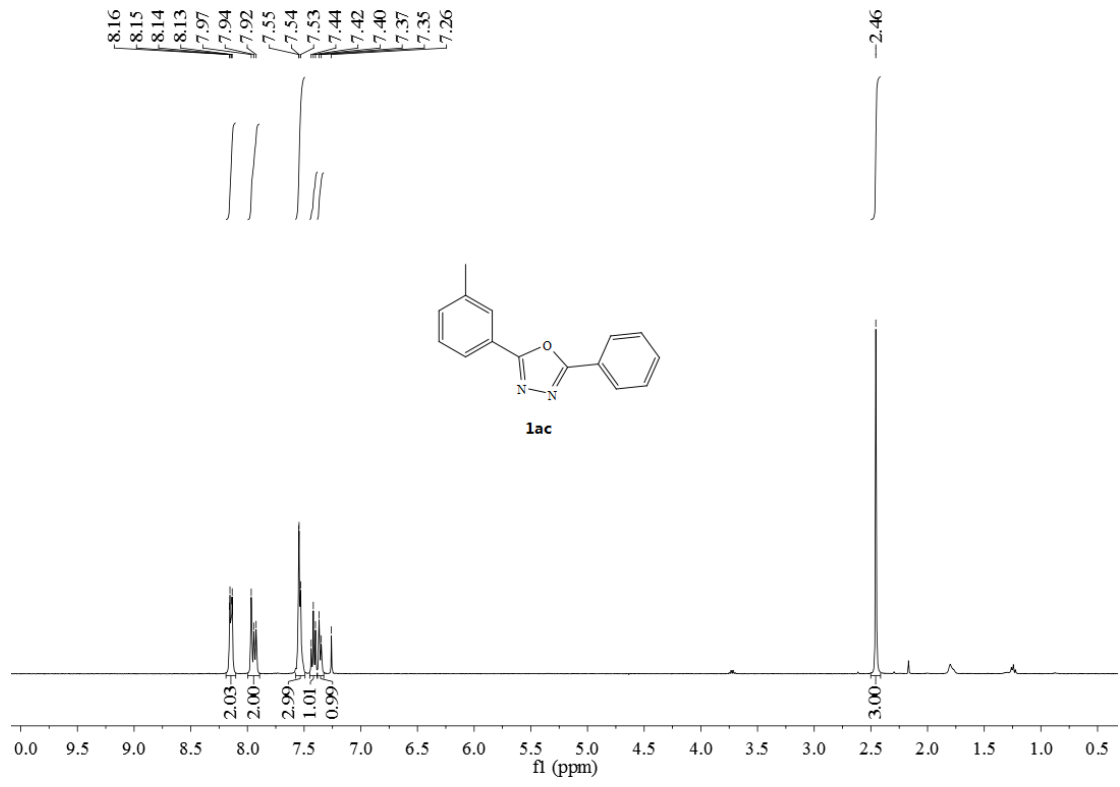

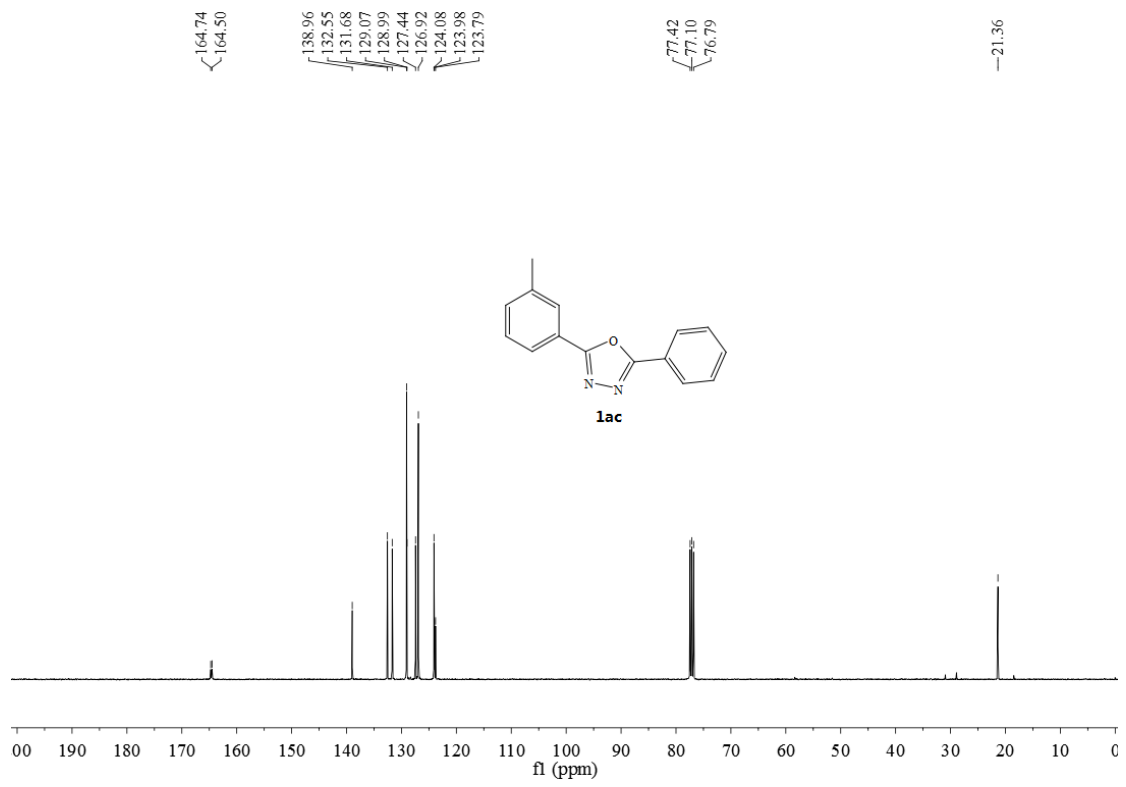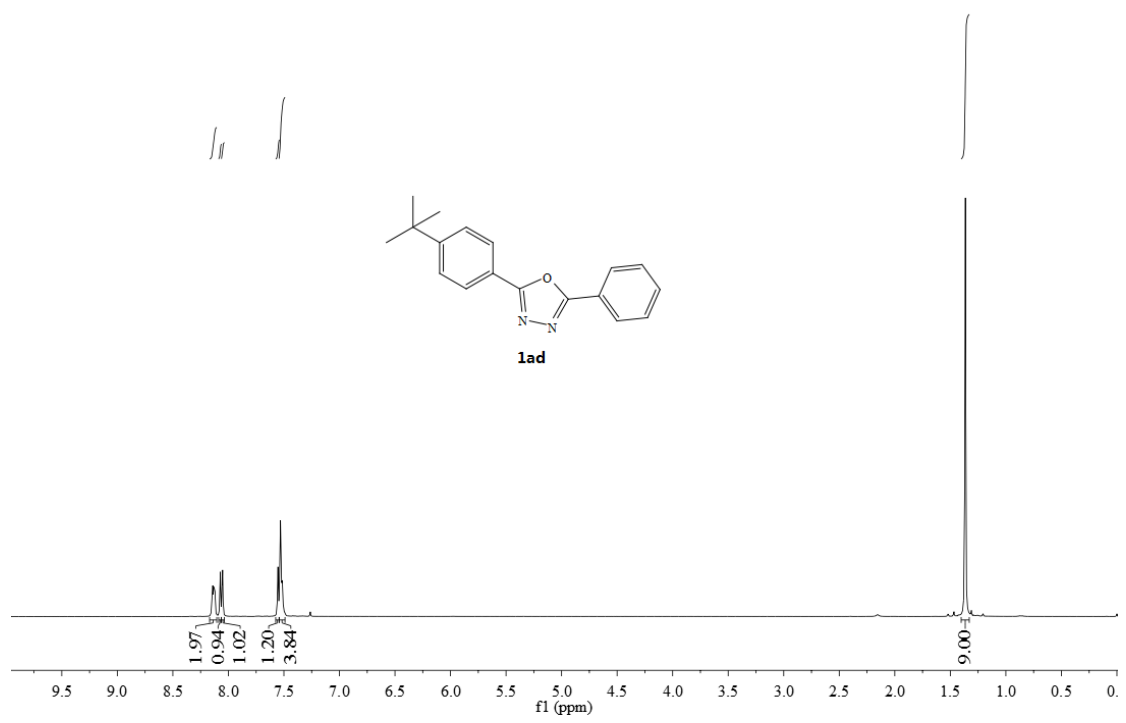

164.73  
164.42  
-155.39

131.68  
129.12  
126.95  
126.84  
126.12  
124.10  
121.16

77.48  
77.16  
76.84

-35.16  
-31.20

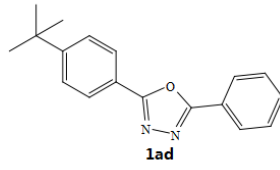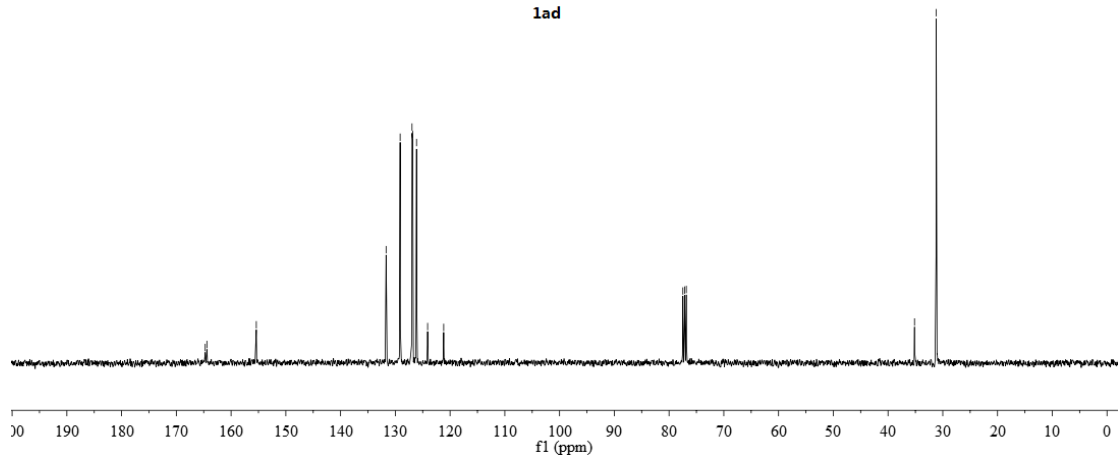

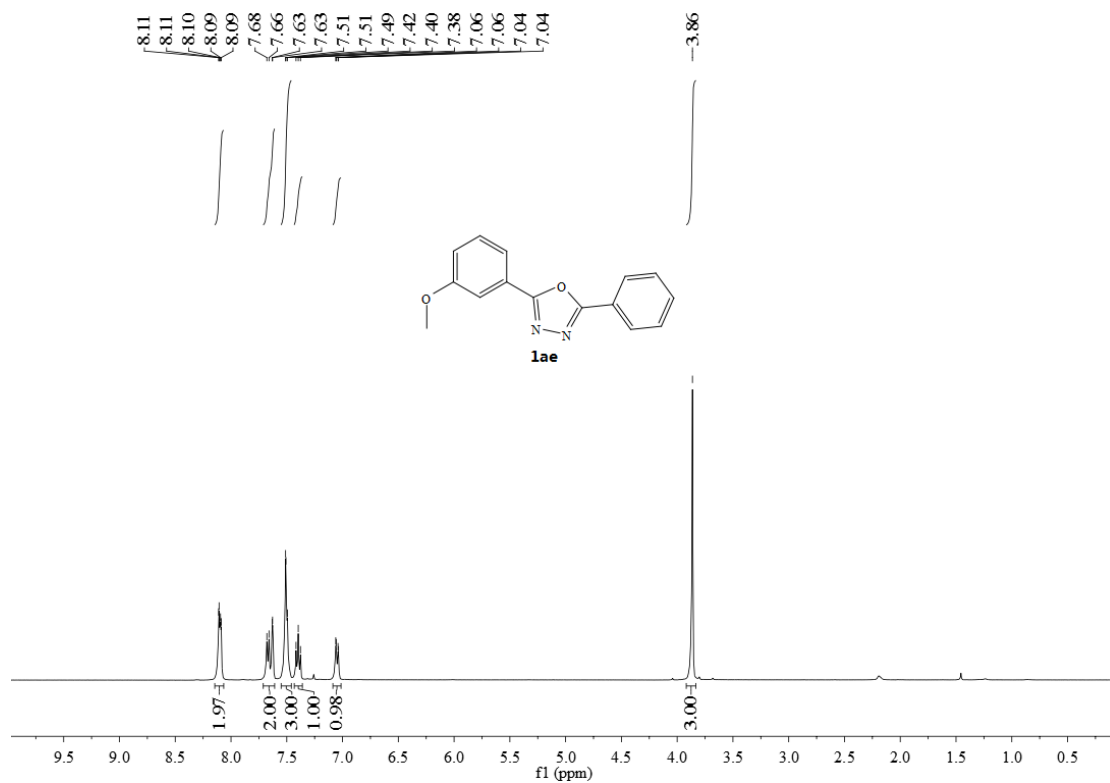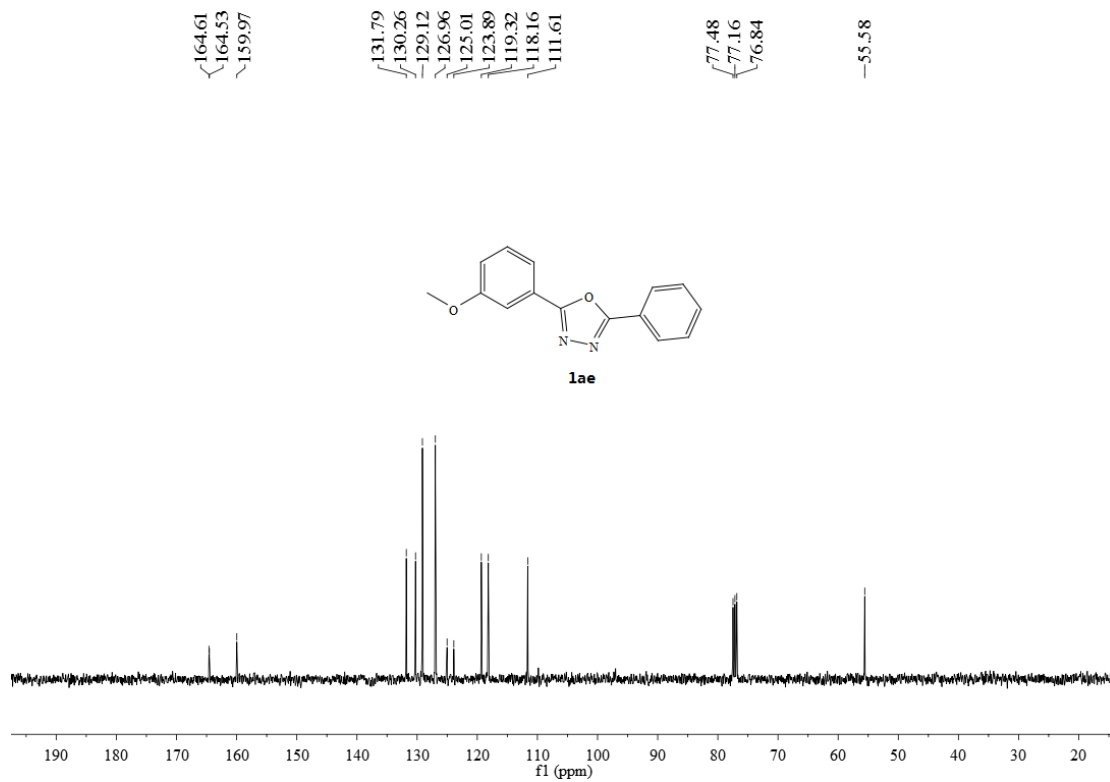

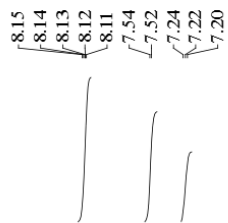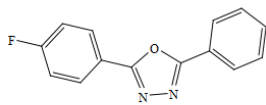

**1af**

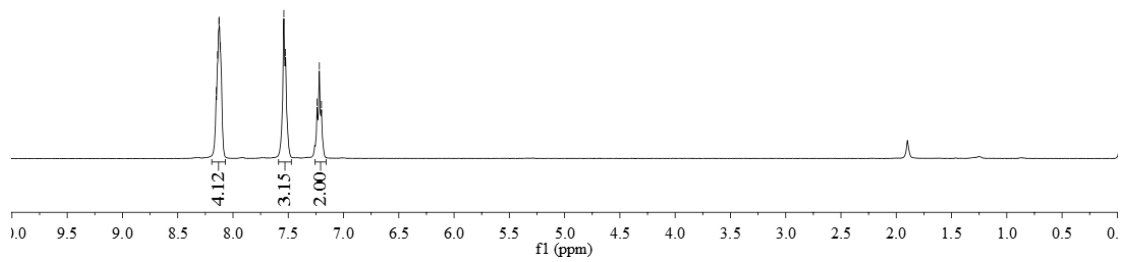



165.74  
164.72  
164.06  
163.88

131.90  
129.35  
129.29  
129.21  
127.02  
123.93  
116.62  
116.47

77.37  
77.16  
76.95

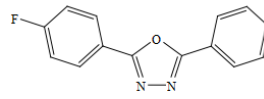

1af

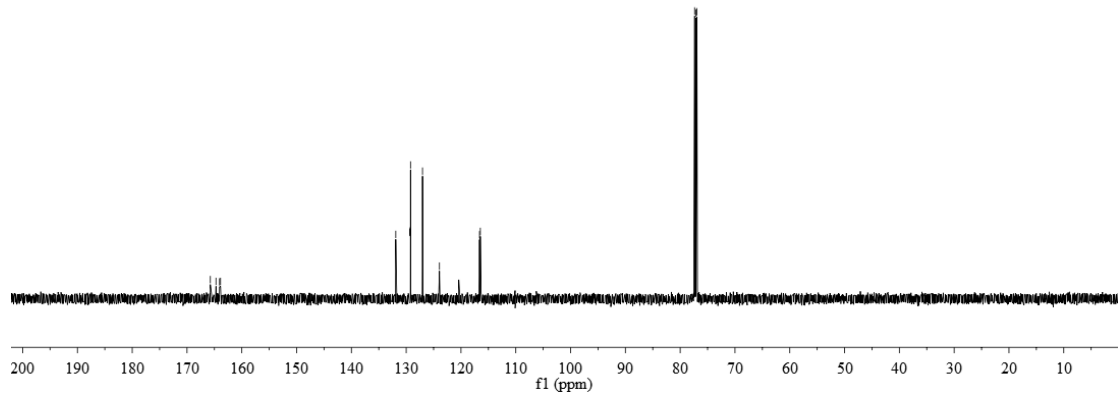

8.12  
8.12  
8.10  
8.10  
8.07  
8.05  
7.57  
7.56  
7.55  
7.55  
7.53  
7.52  
7.51  
7.48  
7.26

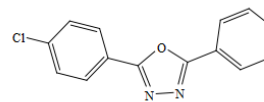

1ag

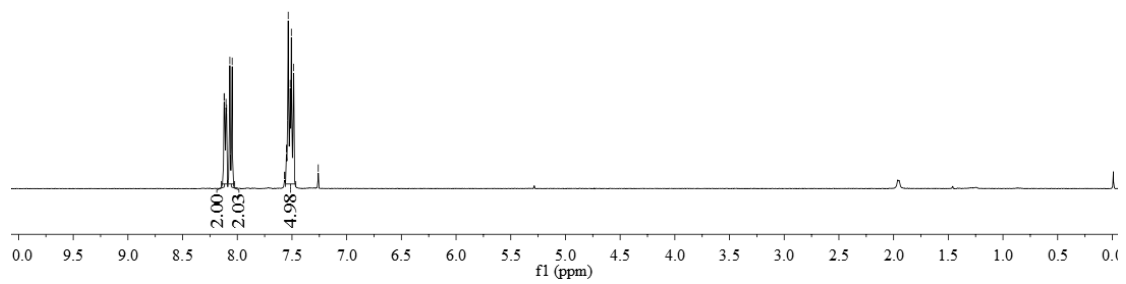

164.78  
163.83

138.06  
131.96  
129.55  
129.20  
128.25  
127.02  
123.76  
122.44

77.48  
77.16  
76.84

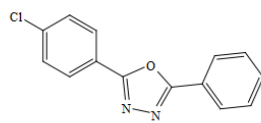

**1ag**

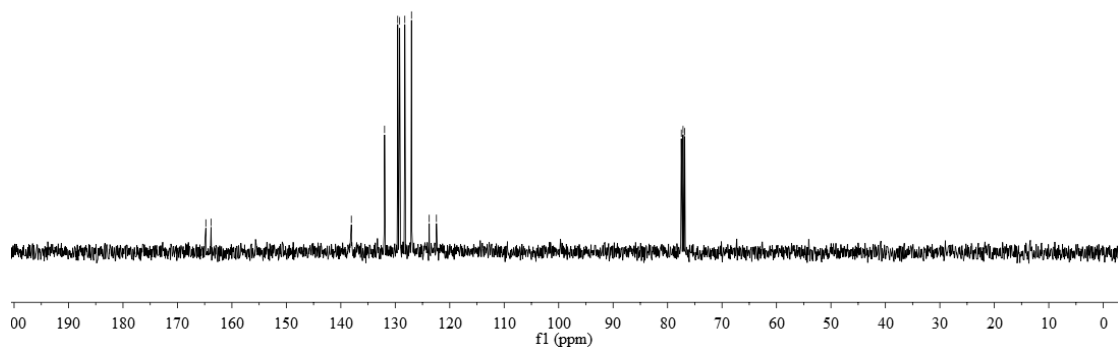

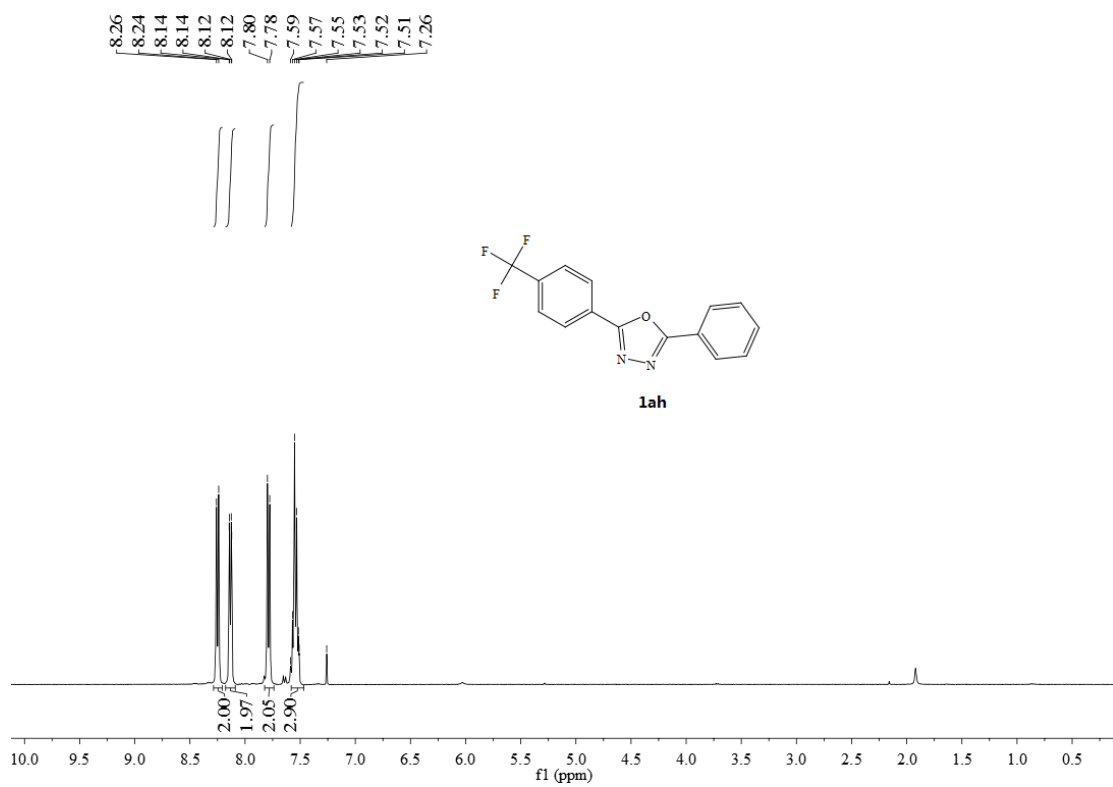

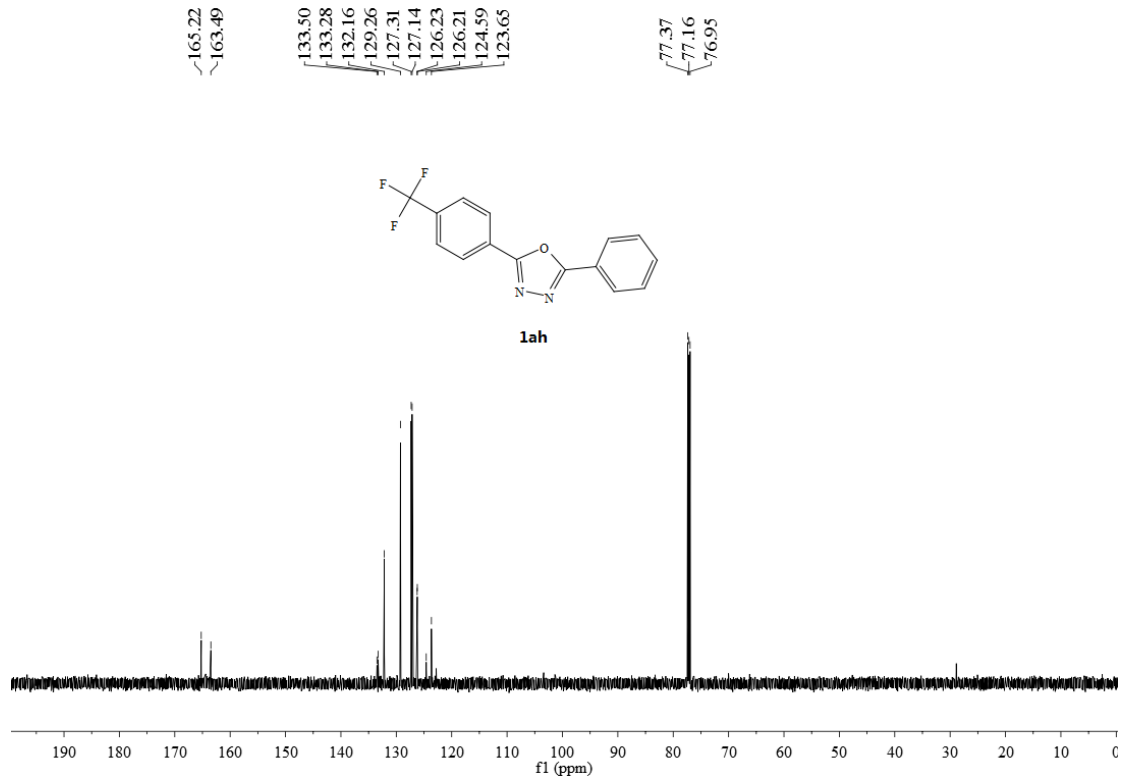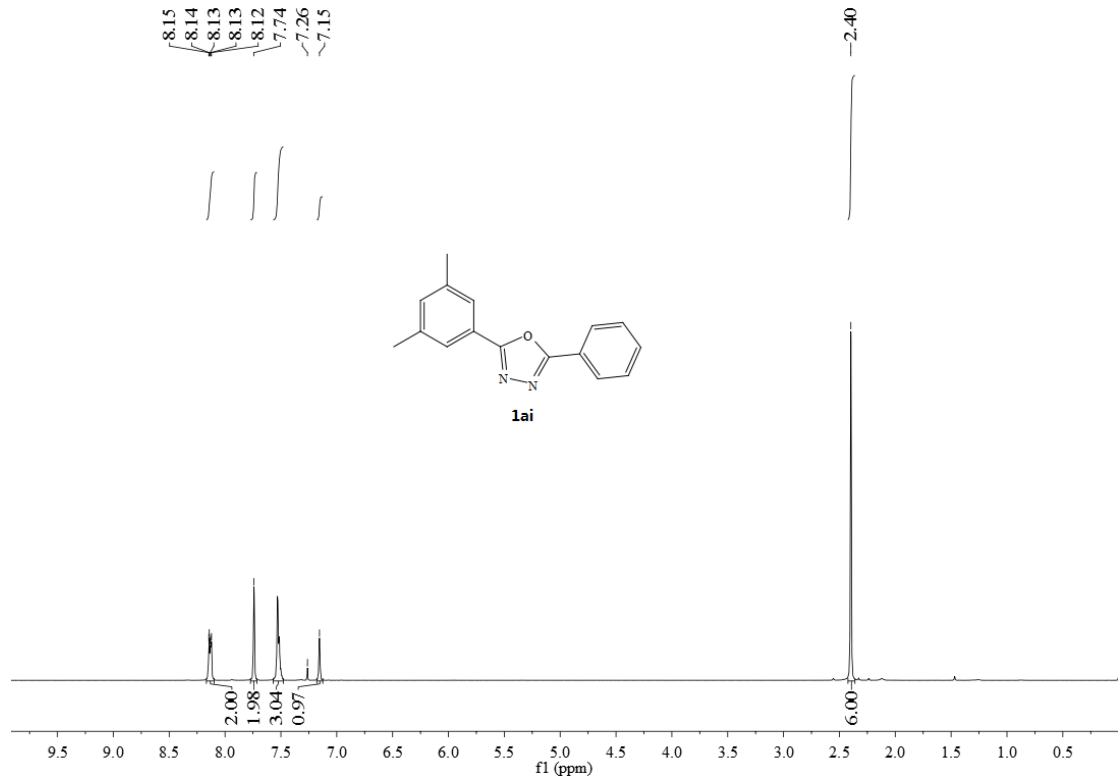

164.93  
164.46

138.88  
133.54  
131.70  
129.11  
126.96  
124.69  
124.08  
123.70

77.48  
77.16  
76.84

21.32

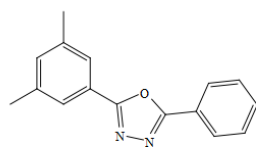

1ai

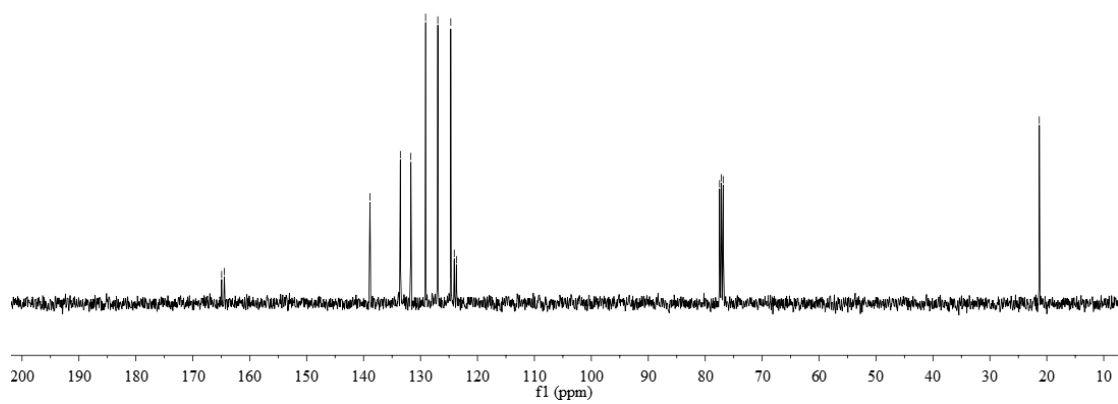

8.14  
8.12  
7.67  
7.66  
7.56  
7.54  
7.26  
7.03  
7.00  
6.98

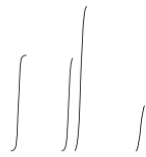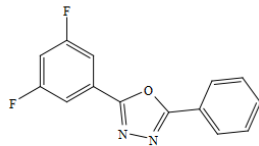

1aj

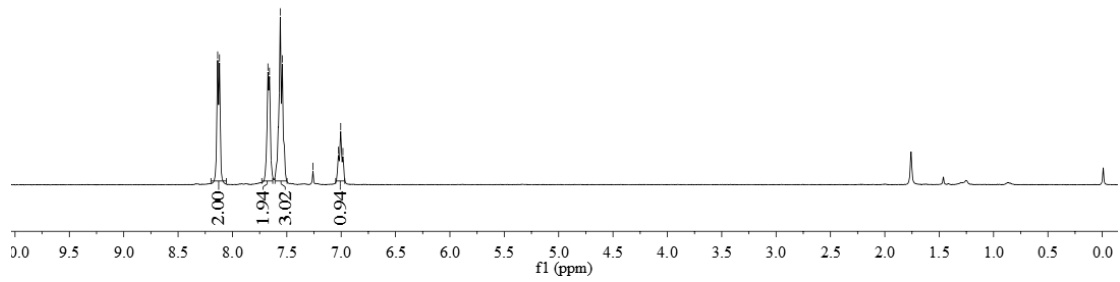

165.25  
164.72  
164.60  
162.92  
162.23  
162.11  
132.28  
129.33  
127.21  
110.35  
110.27  
110.16  
110.08  
107.77  
107.56  
107.31  
107.16  
107.06

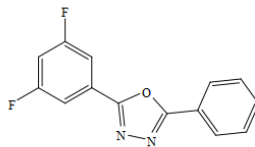

1aj

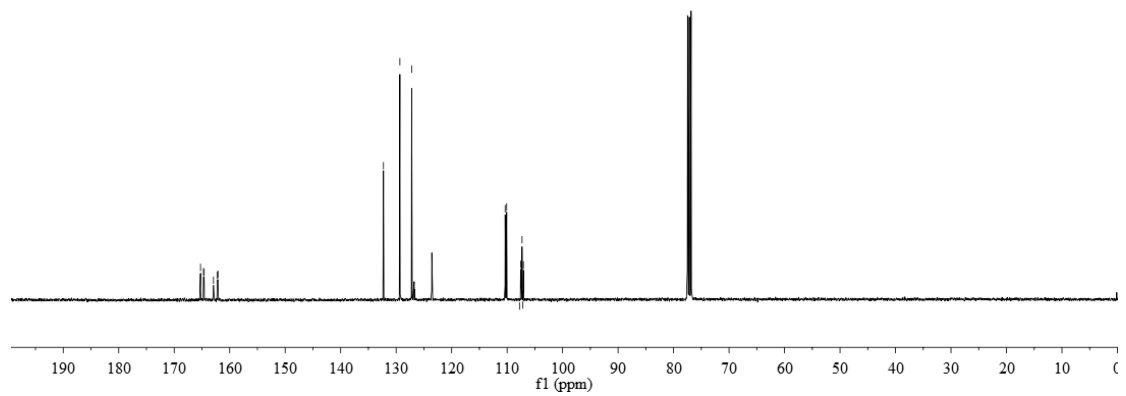

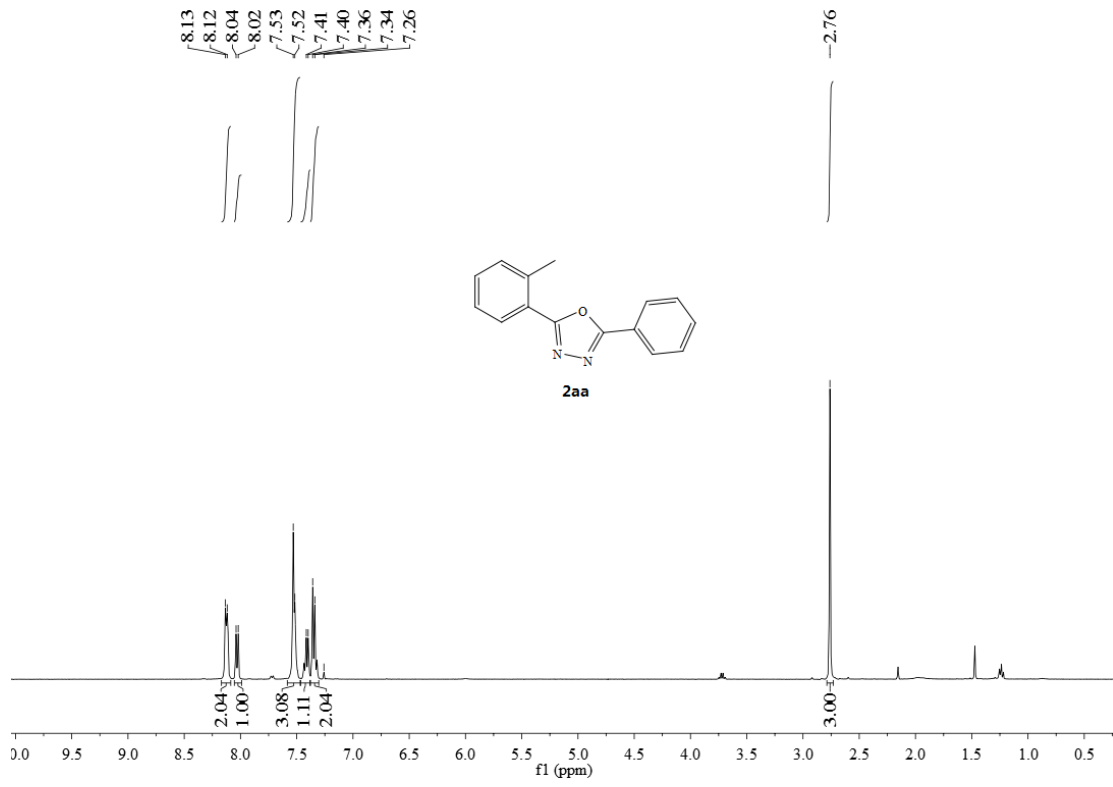

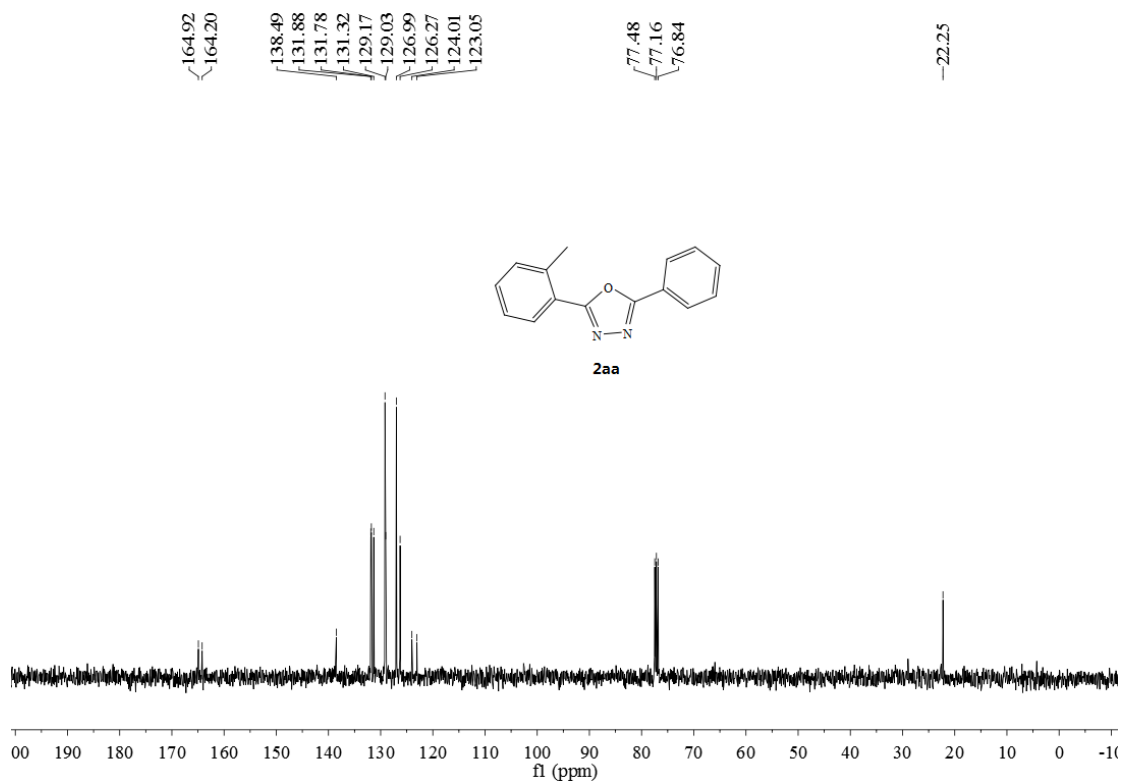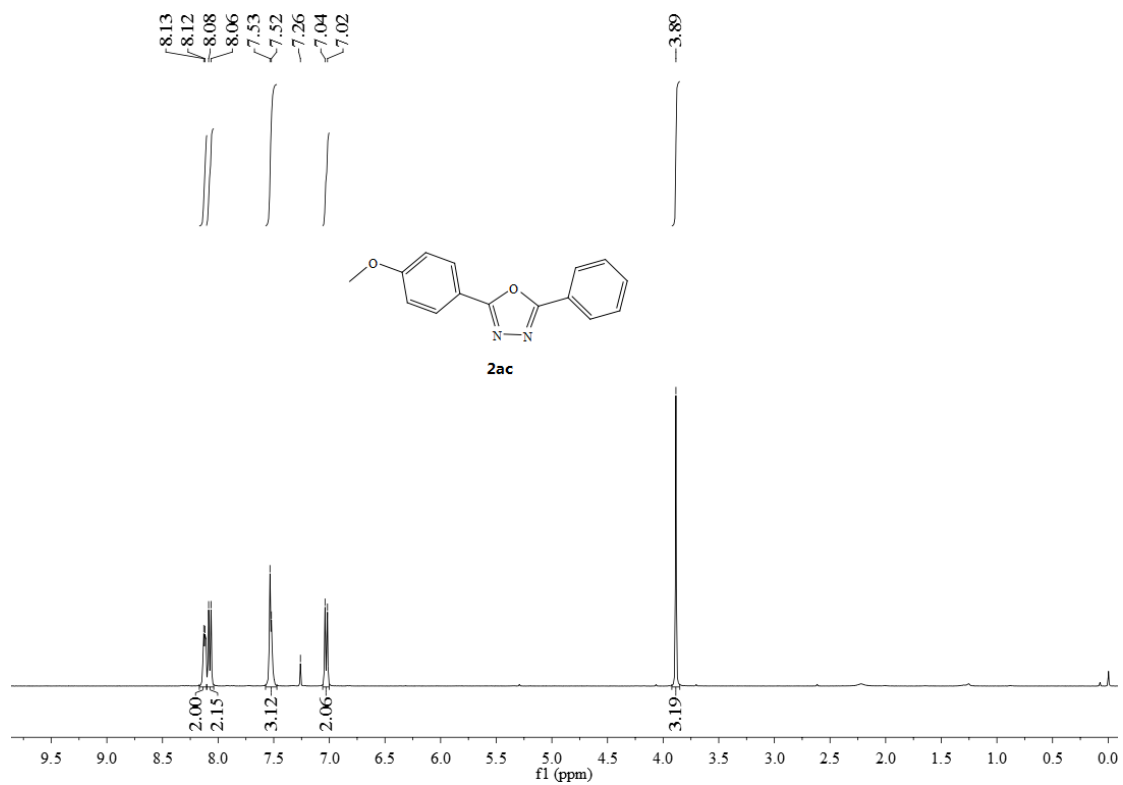



164.65  
164.24  
162.47

131.66  
129.15  
128.83  
126.94  
124.19  
114.63

77.48  
77.16  
76.84

55.61

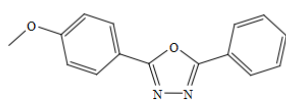

**2ac**

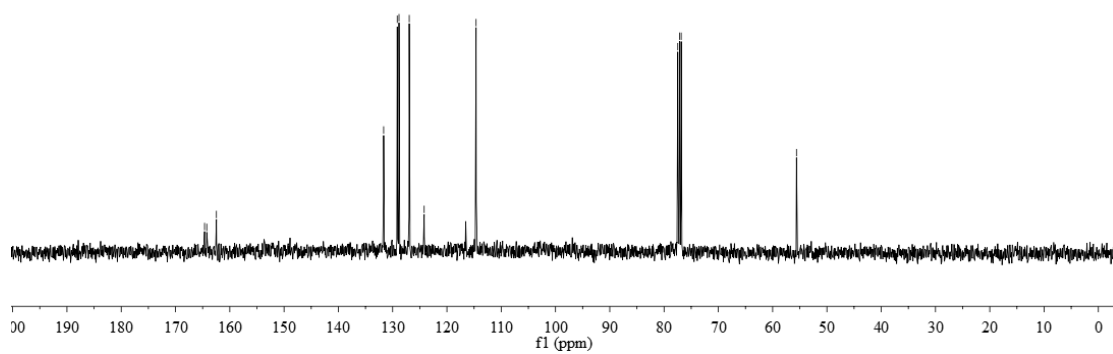

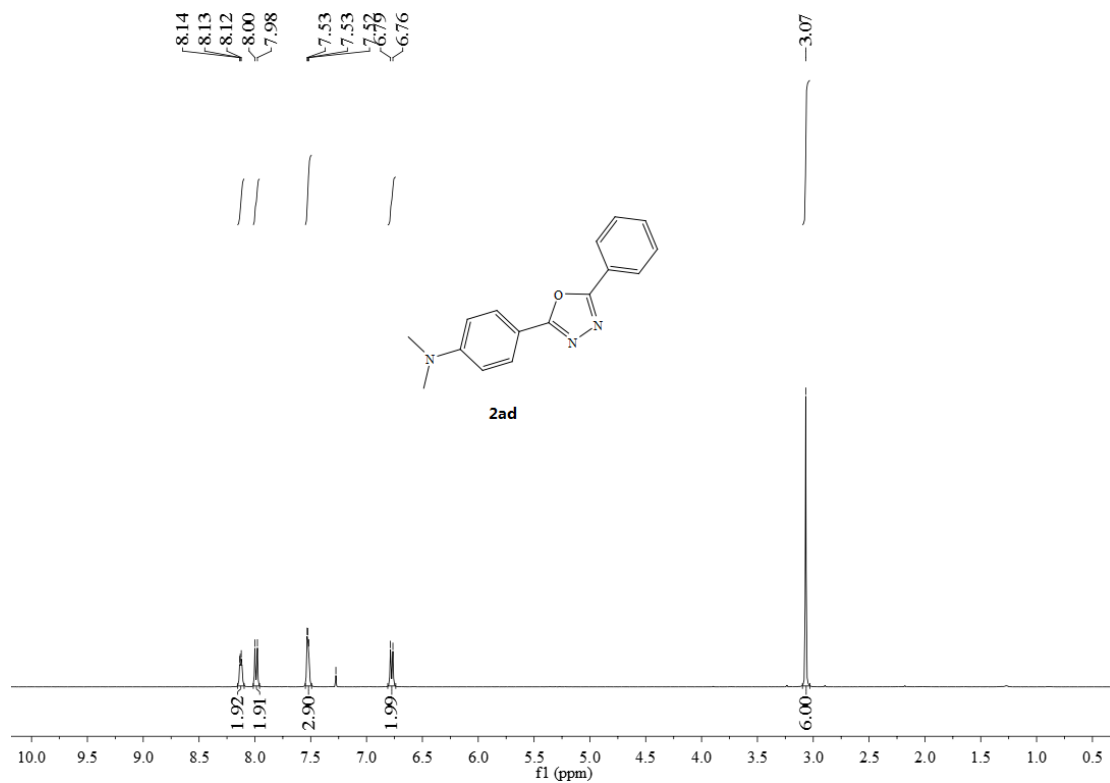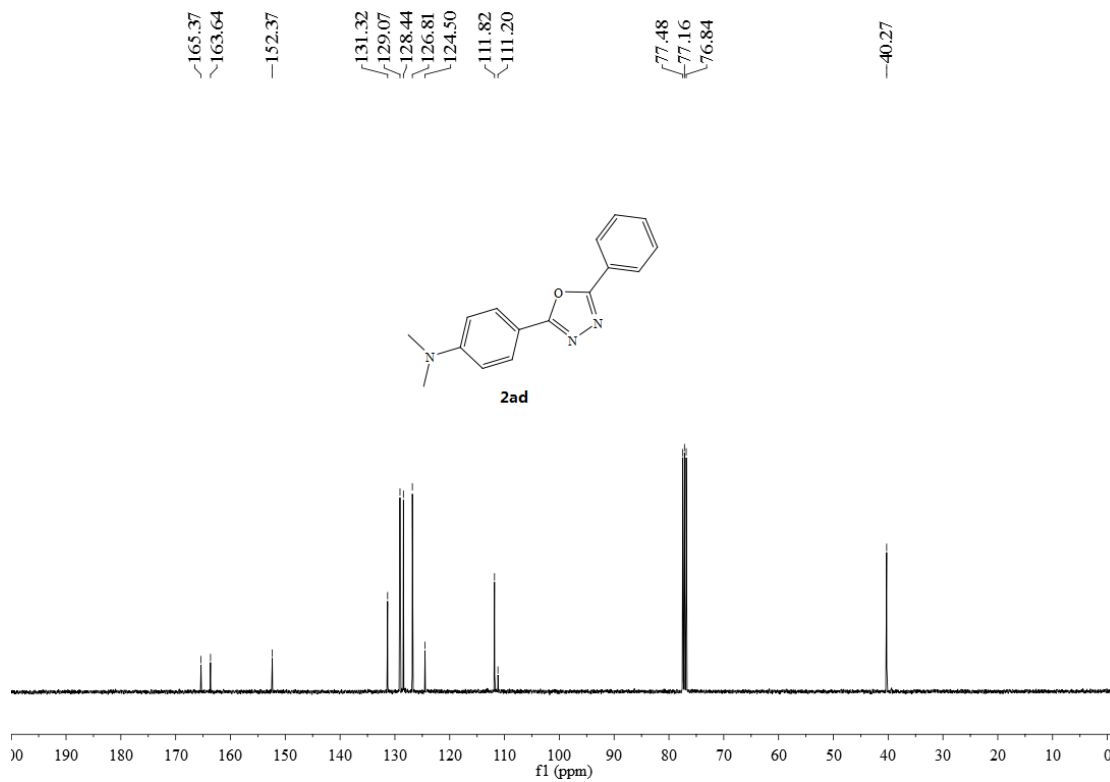

8.11  
8.08  
8.07  
8.06  
8.05  
8.04  
7.65  
7.63  
7.55  
7.54  
7.45  
7.44  
7.44  
7.43  
7.43  
7.40  
7.38  
7.36  
7.32  
7.30

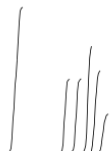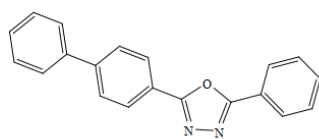

2ag

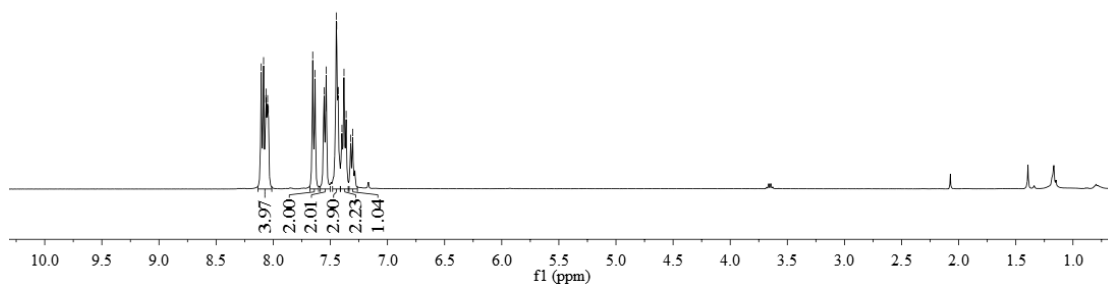

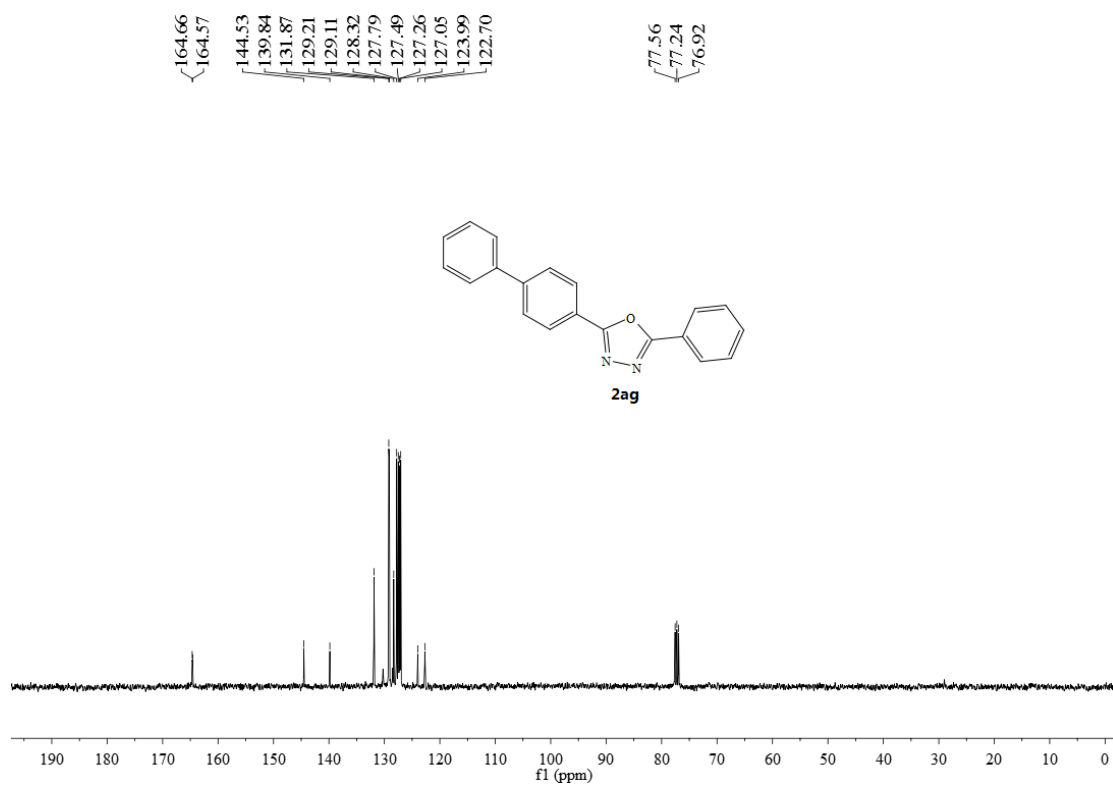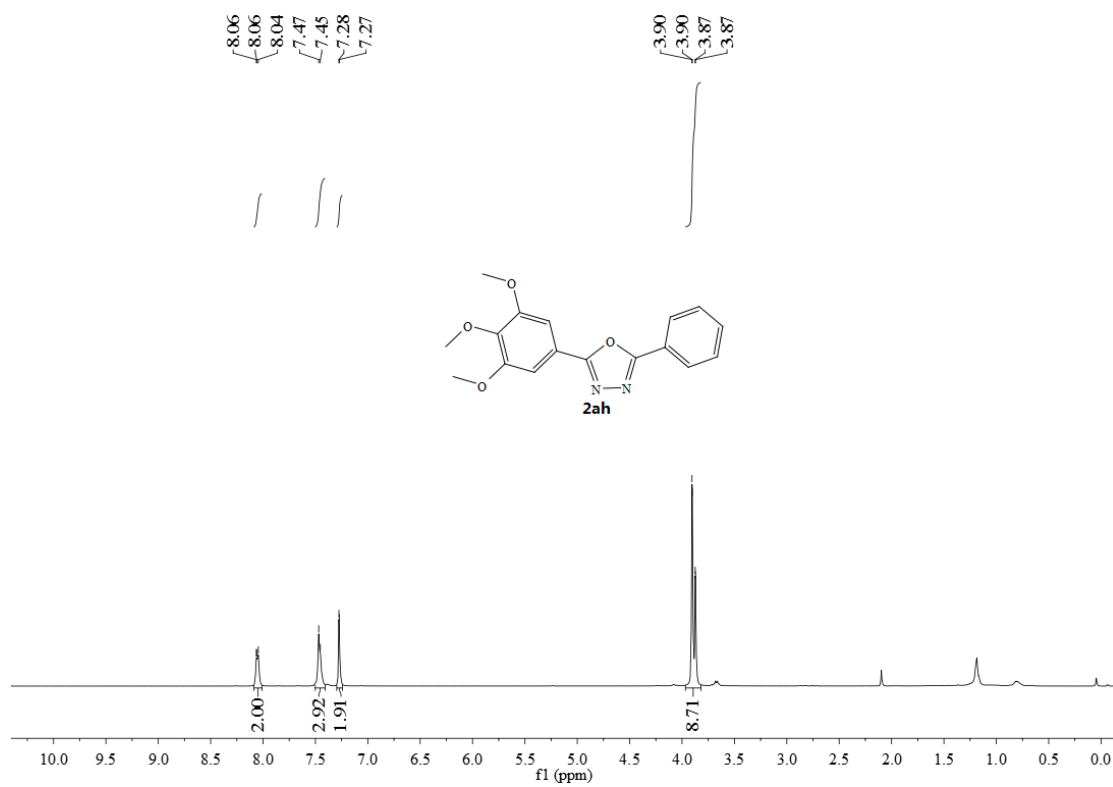

-164.35  
-153.53  
-140.97  
131.63  
-128.95  
126.76  
123.66  
118.80  
-103.99  
77.48  
77.16  
76.84  
-60.90  
-56.26  
-29.61

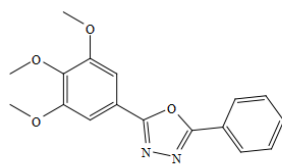

2ah

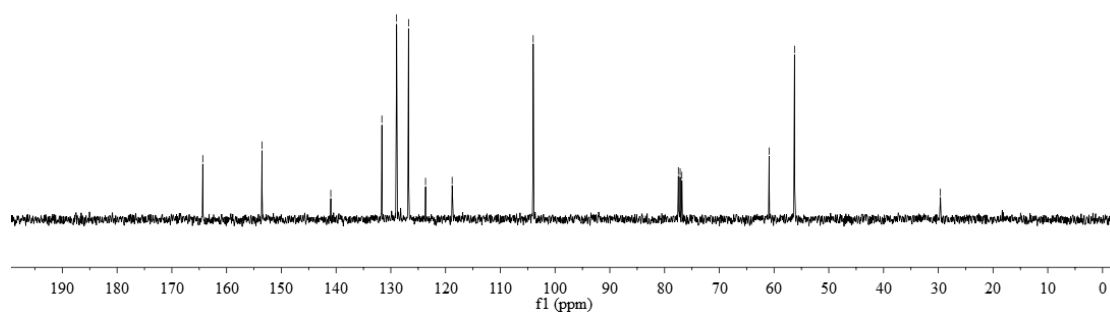

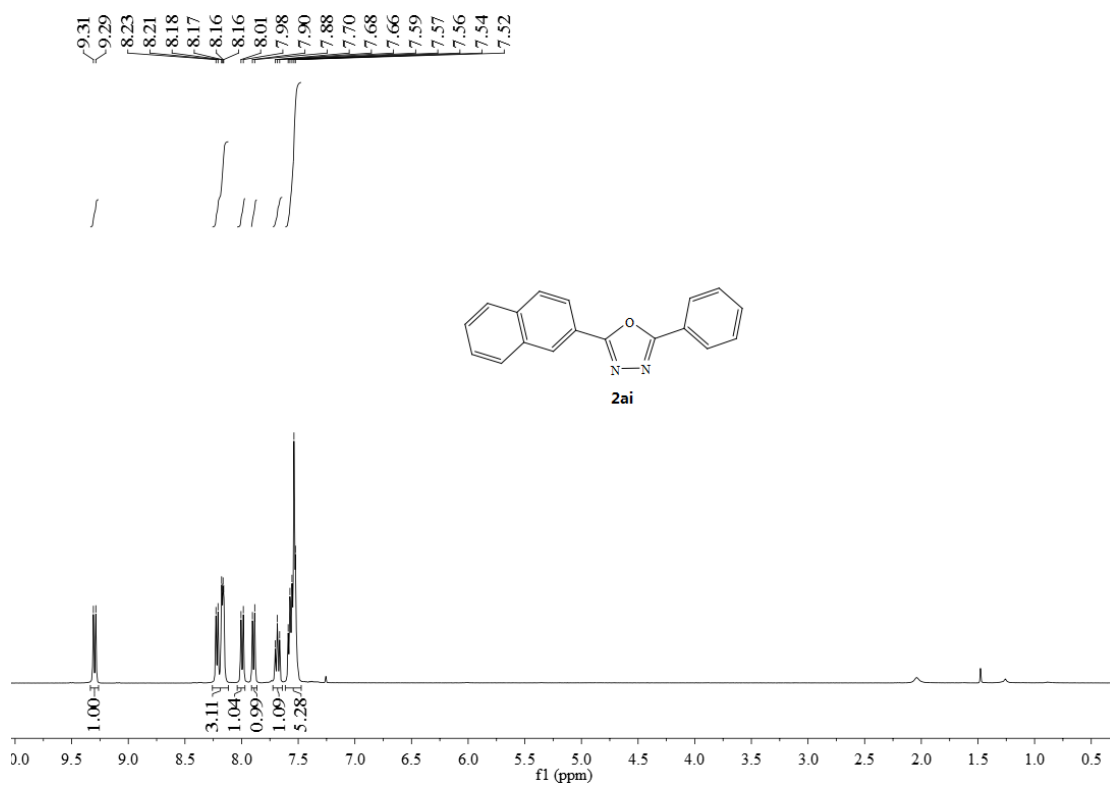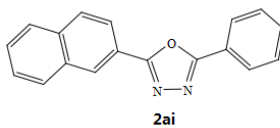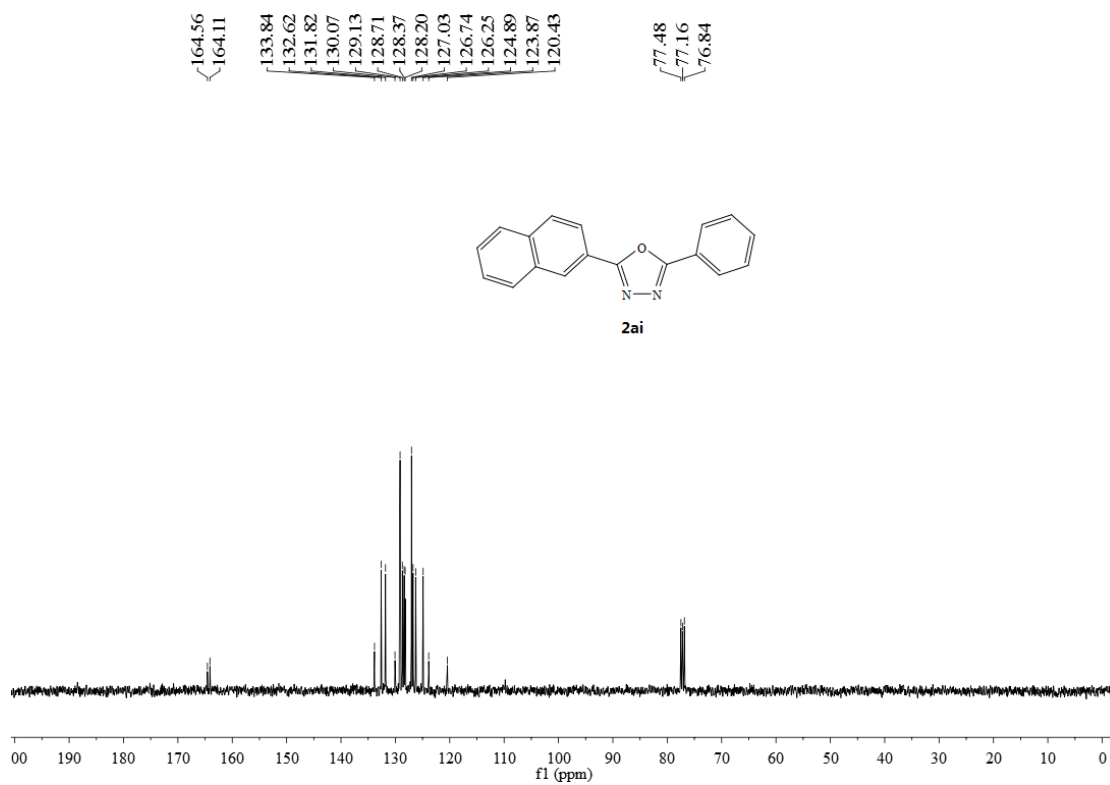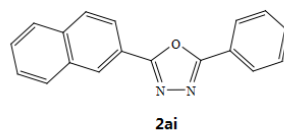

8.13  
8.13  
8.11  
8.11  
7.70  
7.68  
7.54  
7.54  
7.52  
7.26  
6.96  
6.08

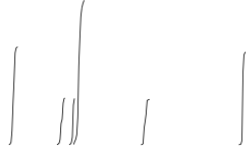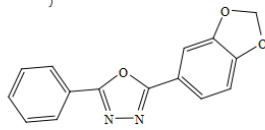

2aj

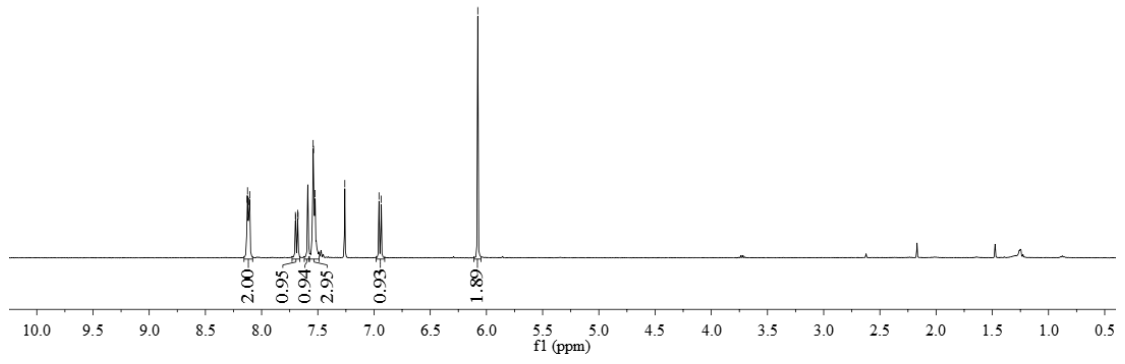

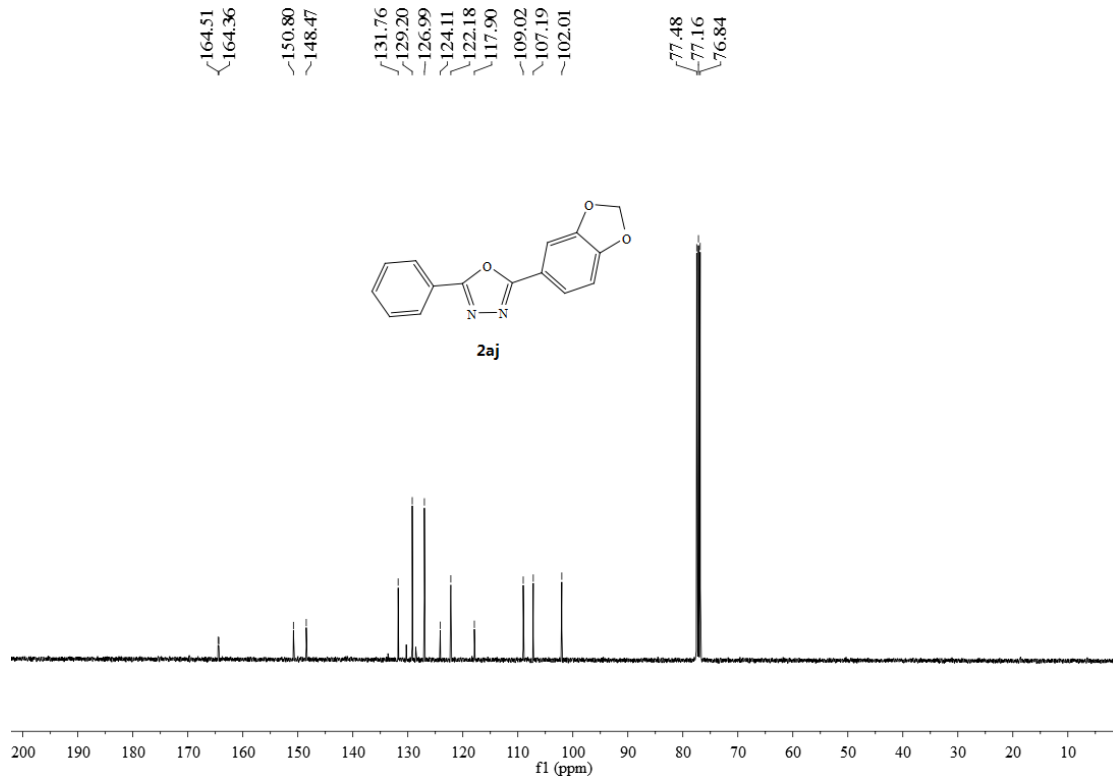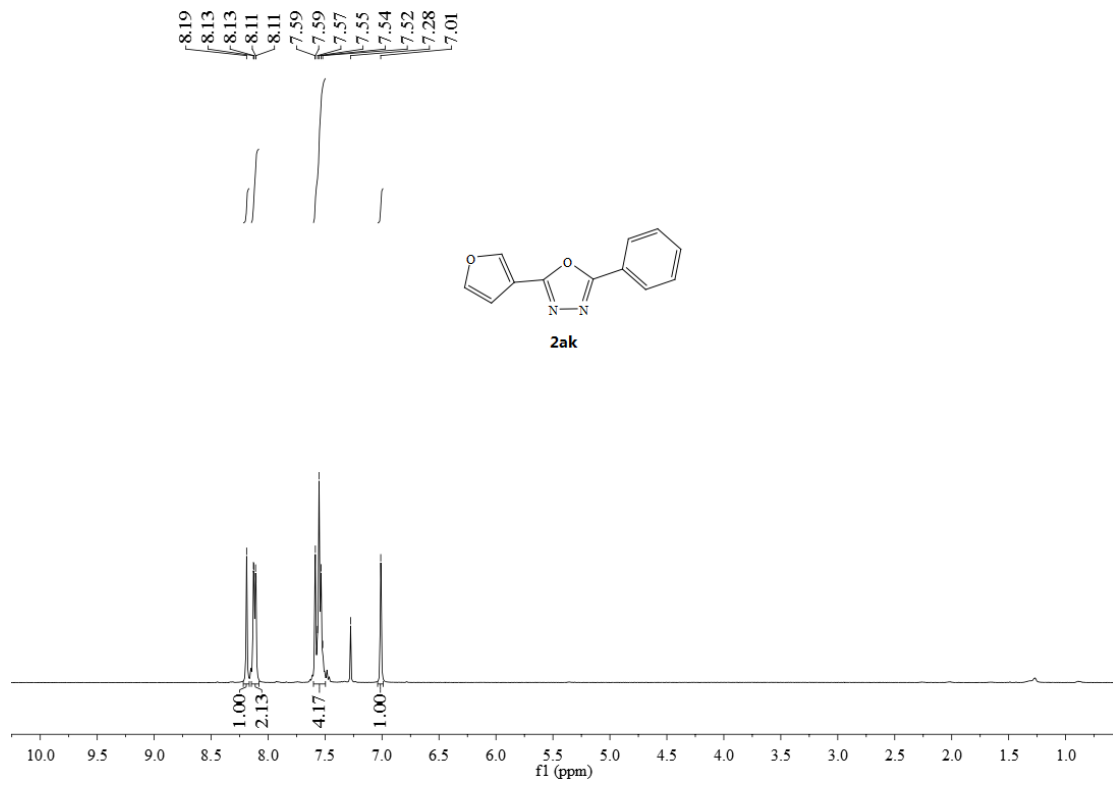



164.29  
159.72  
144.39  
143.84  
131.61  
129.16  
126.98  
123.33  
111.73  
108.65  
77.48  
77.16  
76.84

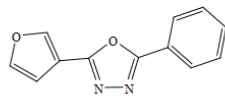

2ak

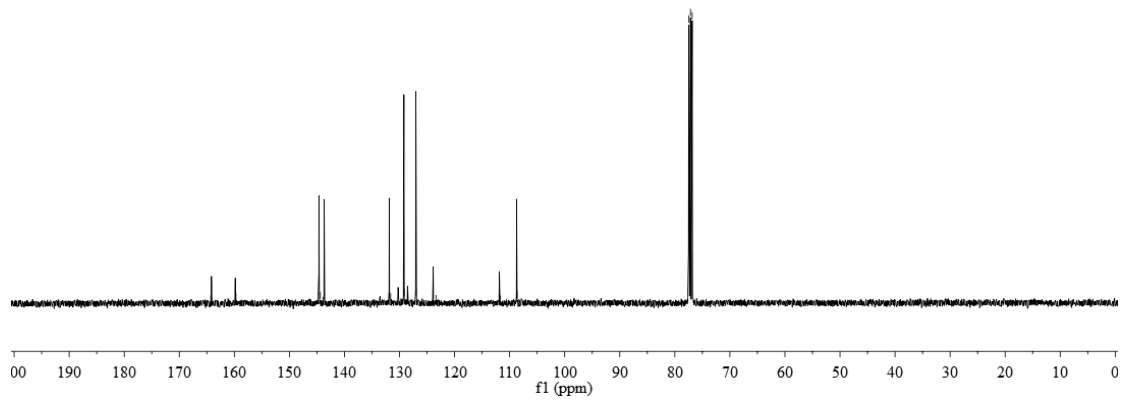

8.12  
7.74  
7.73  
7.54  
7.53  
7.49  
7.48  
7.26

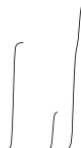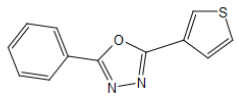

2a1

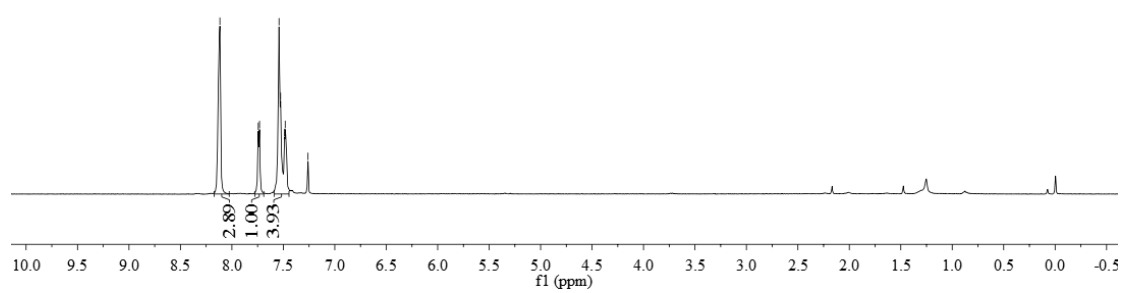

164.10  
161.46  
131.84  
129.20  
127.62  
127.58  
127.05  
126.20  
125.39  
123.95  
77.58  
77.16  
76.74

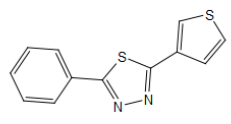

2a1

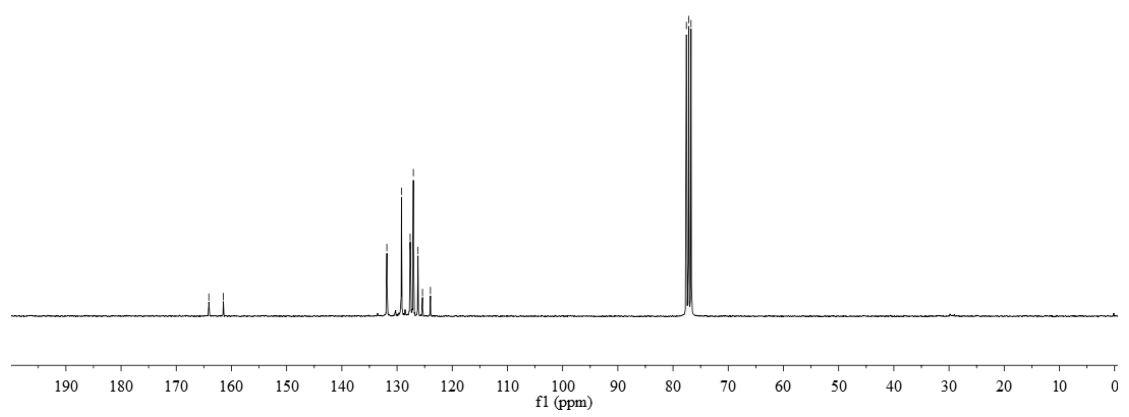

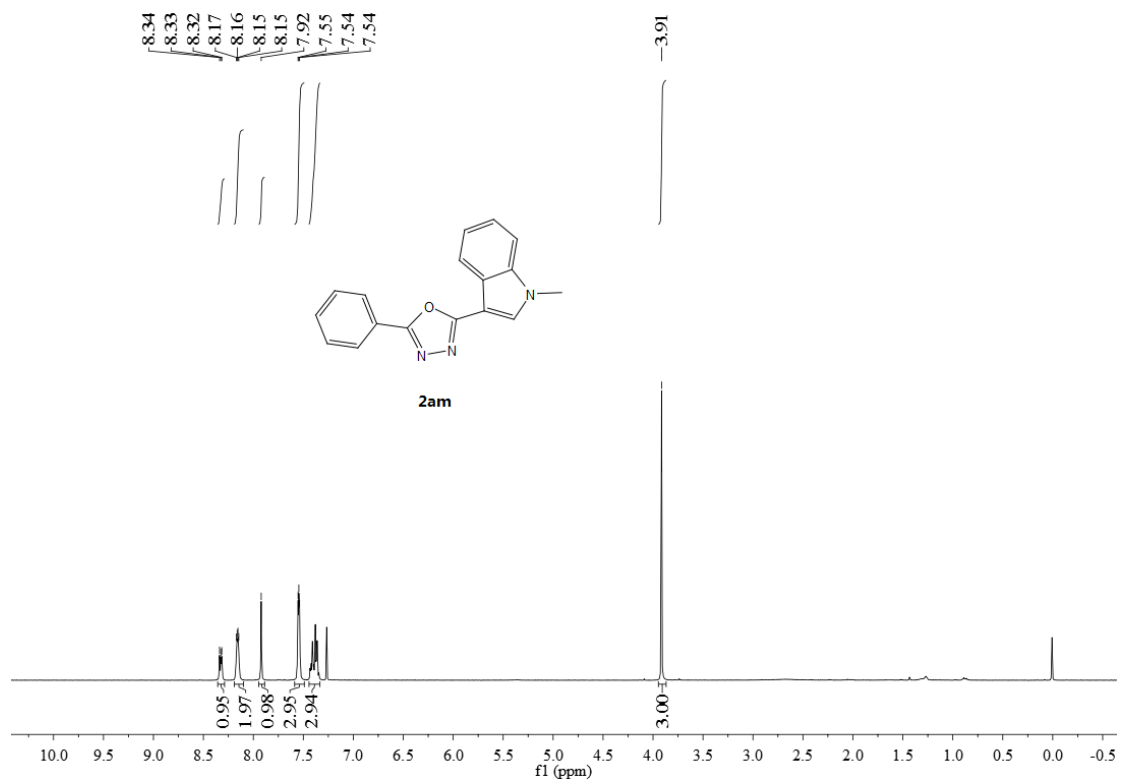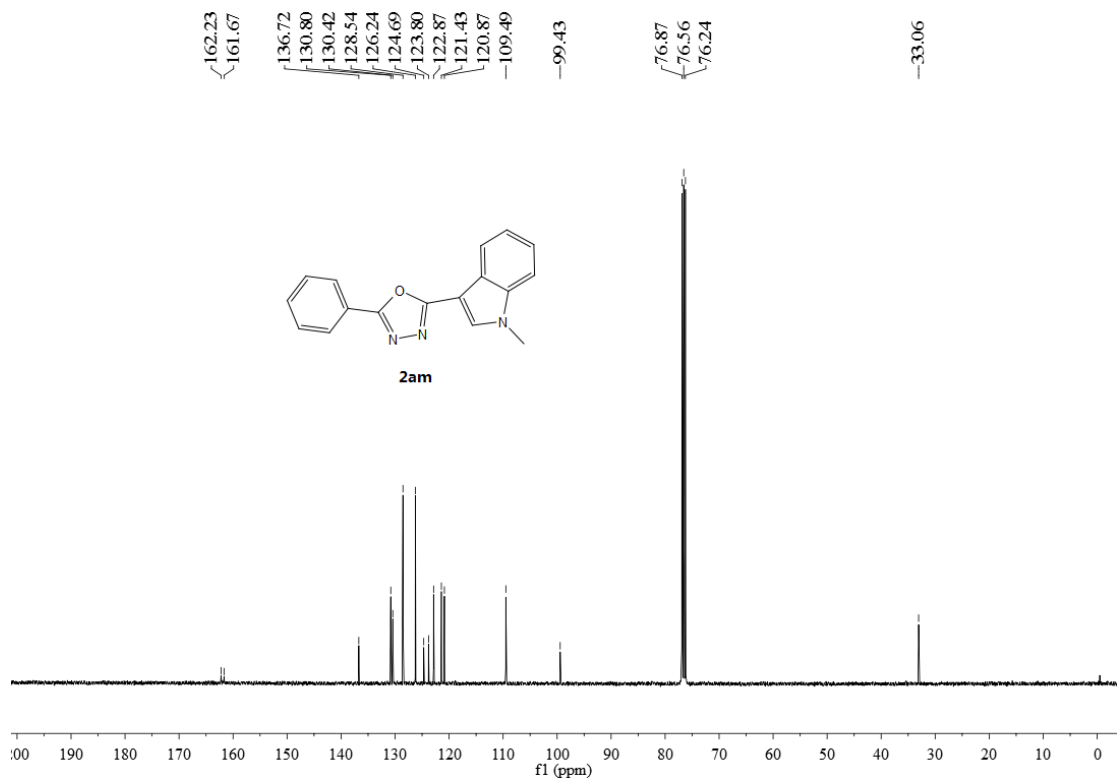

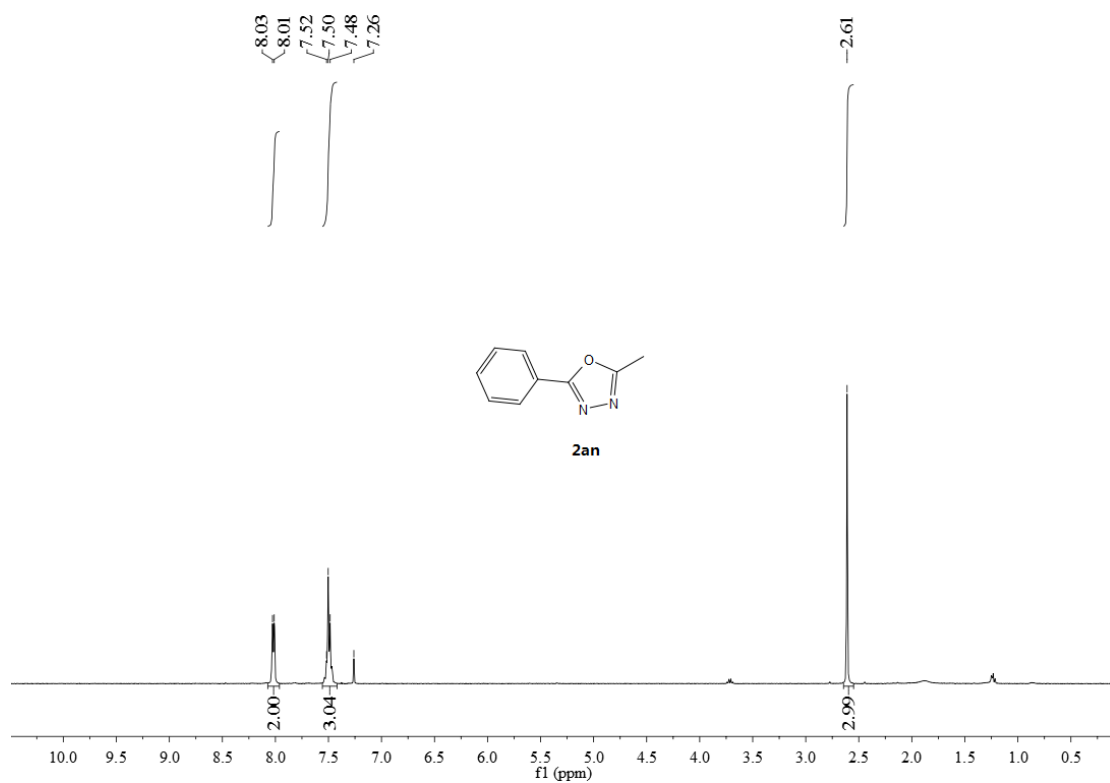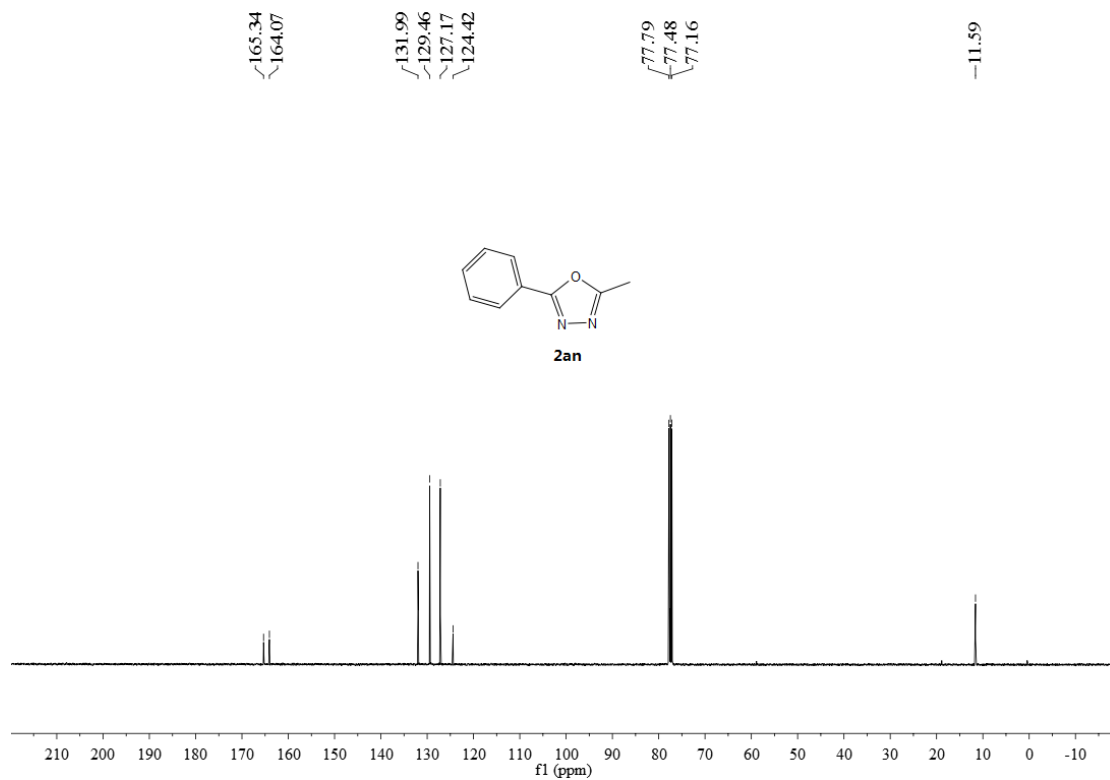

8.04  
8.04  
8.02  
7.50  
7.48  
7.26  
7.26

3.01  
2.99  
2.96

2.15  
2.12  
1.88  
1.87  
1.85  
1.76  
1.73  
1.71  
1.67  
1.44  
1.42  
1.41  
1.38  
1.24

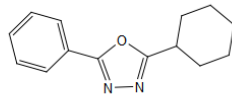

2ao

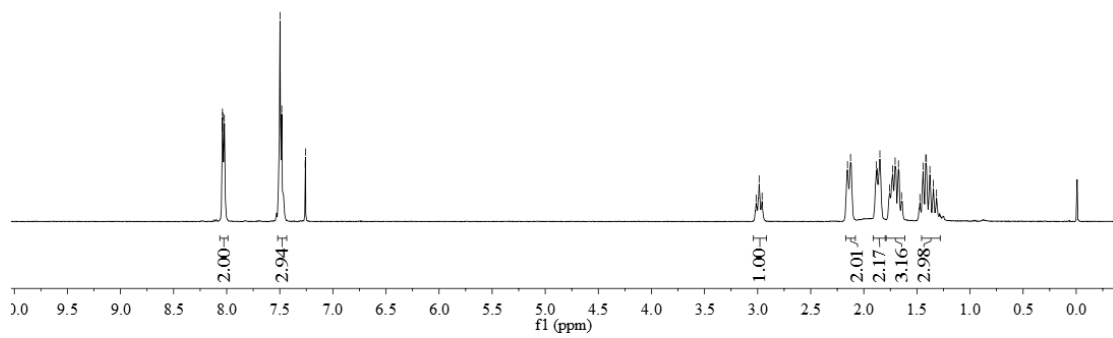

169.54  
163.92

130.95  
128.49  
126.30  
123.73

76.88  
76.56  
76.25

34.83  
29.73  
25.13  
24.94

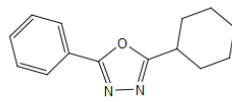

2ao

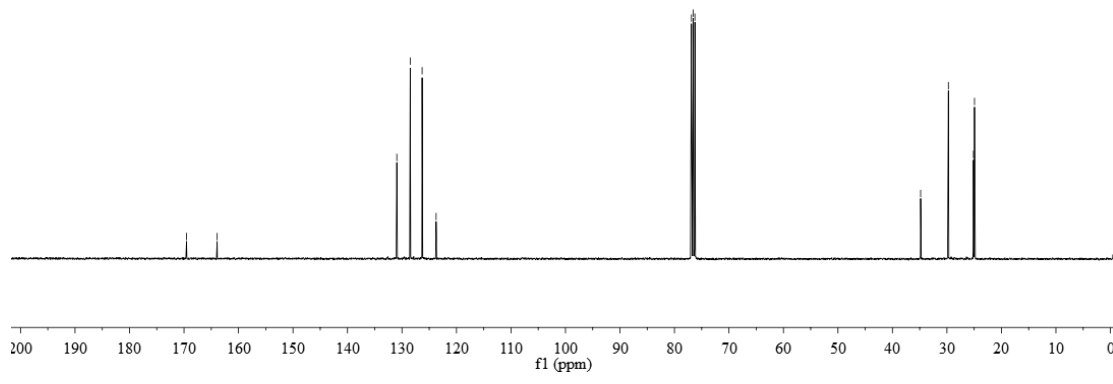

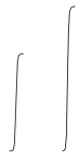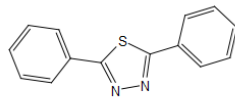

3aa

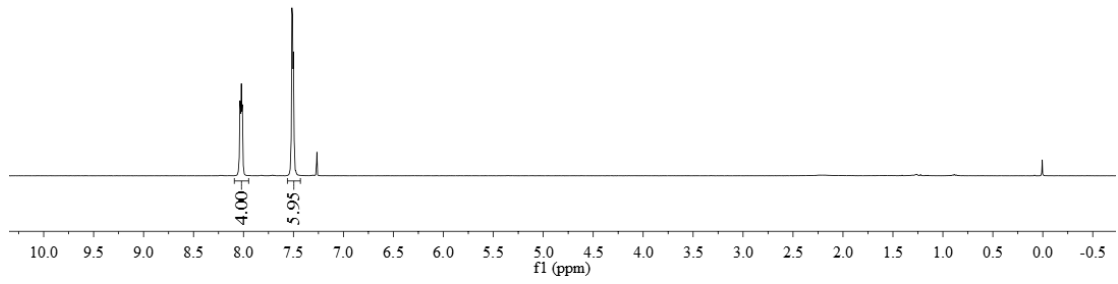

-167.67

130.65  
129.70  
128.72  
127.47

76.90  
76.58  
76.26

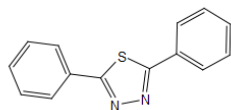

3aa

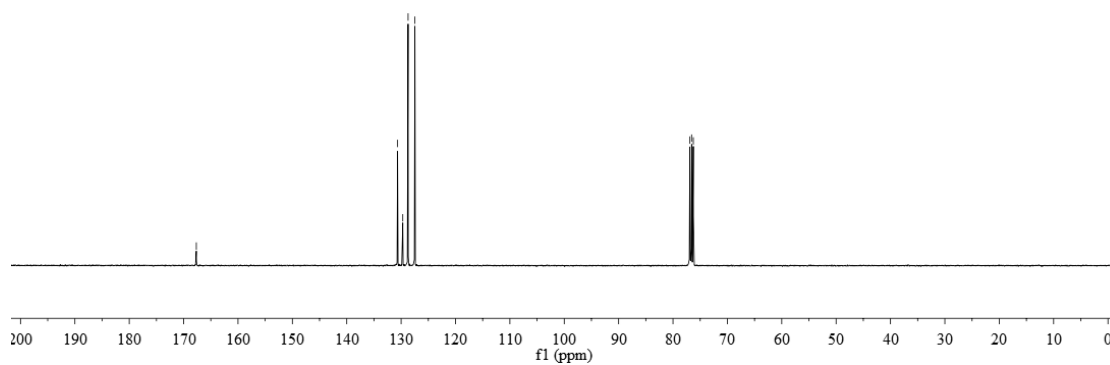

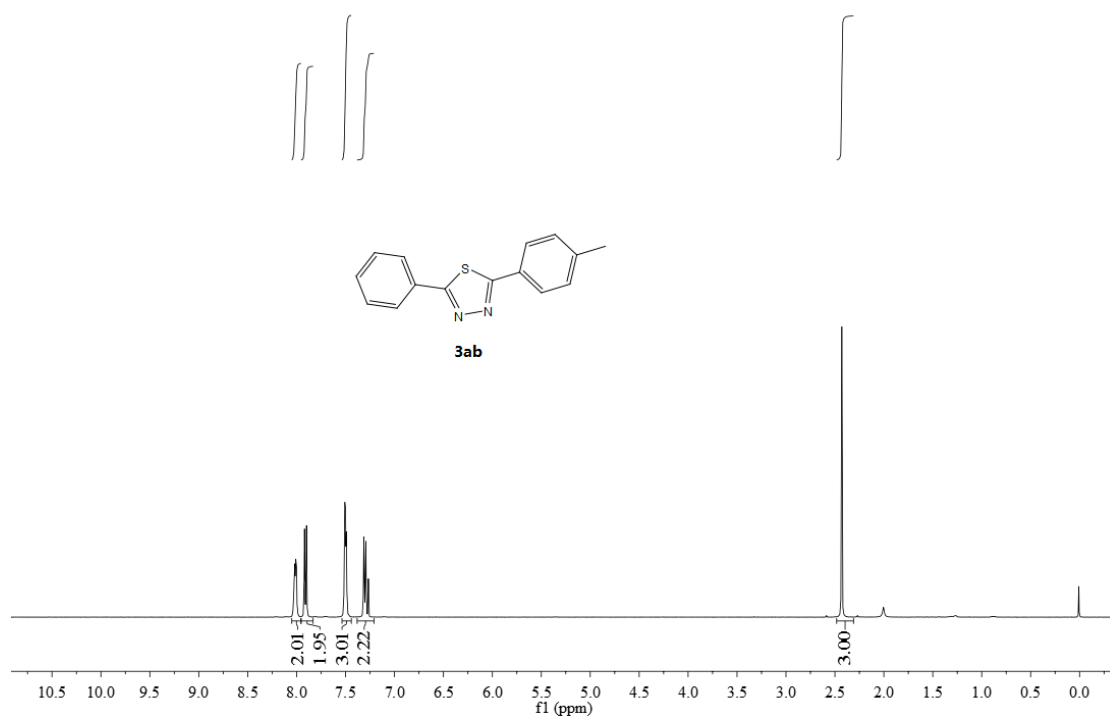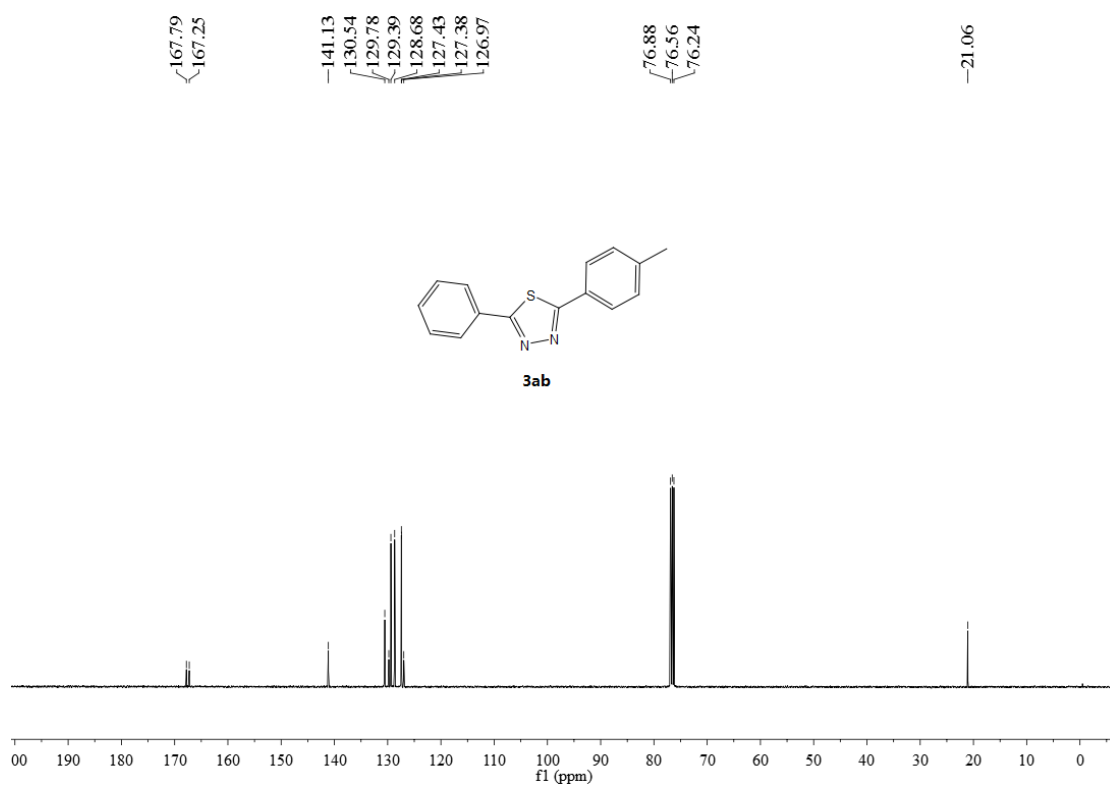



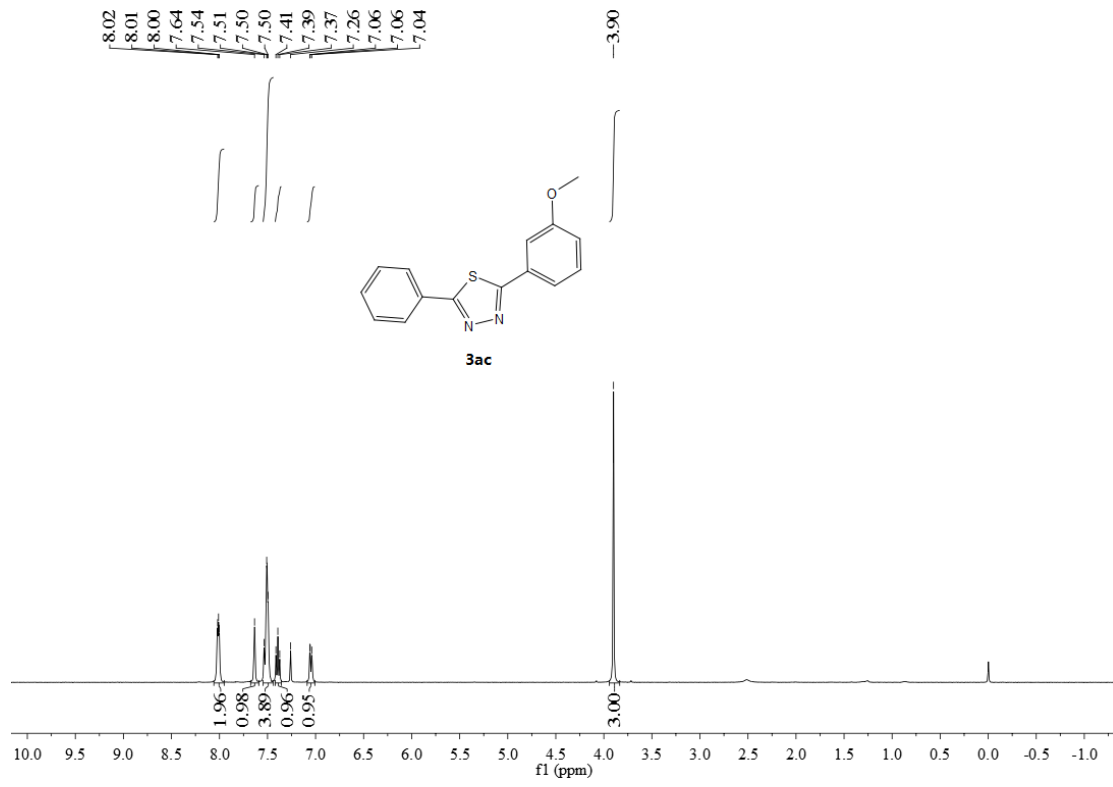

168.62  
168.47  
-160.46

131.70  
131.59  
130.65  
130.53  
129.62  
128.37  
121.13  
117.95  
112.66

77.78  
77.46  
77.14

-55.94

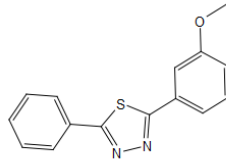

**3ac**

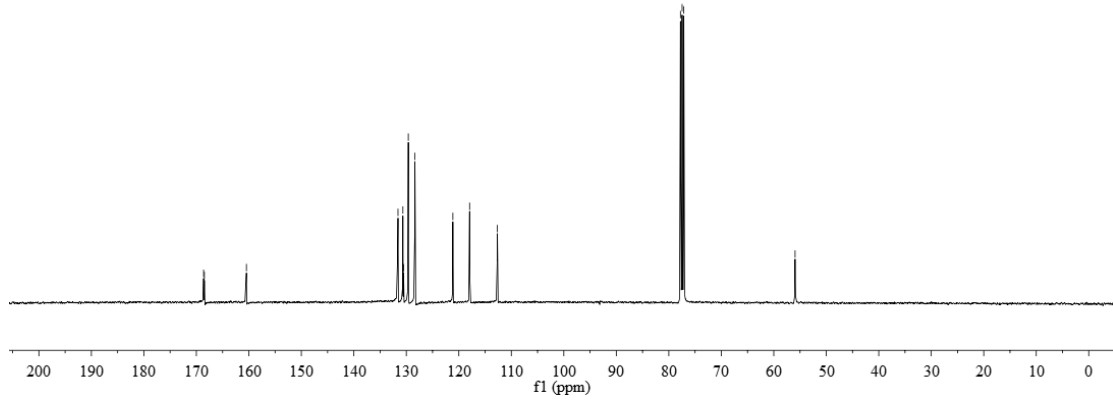

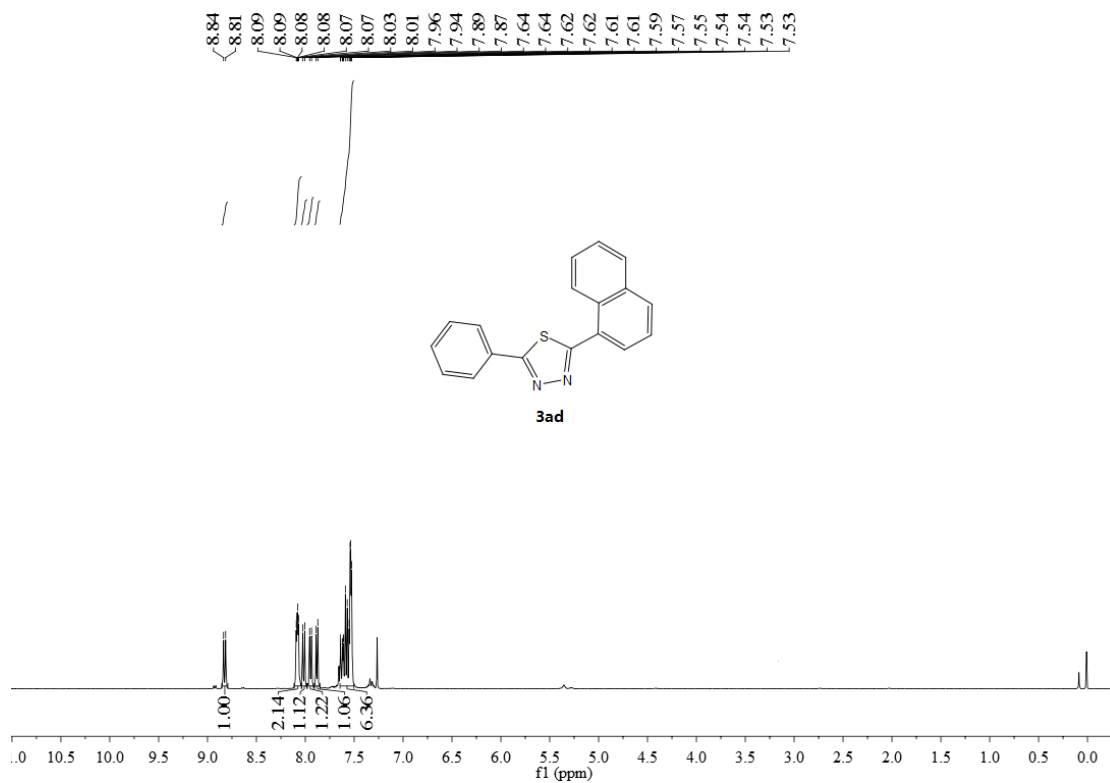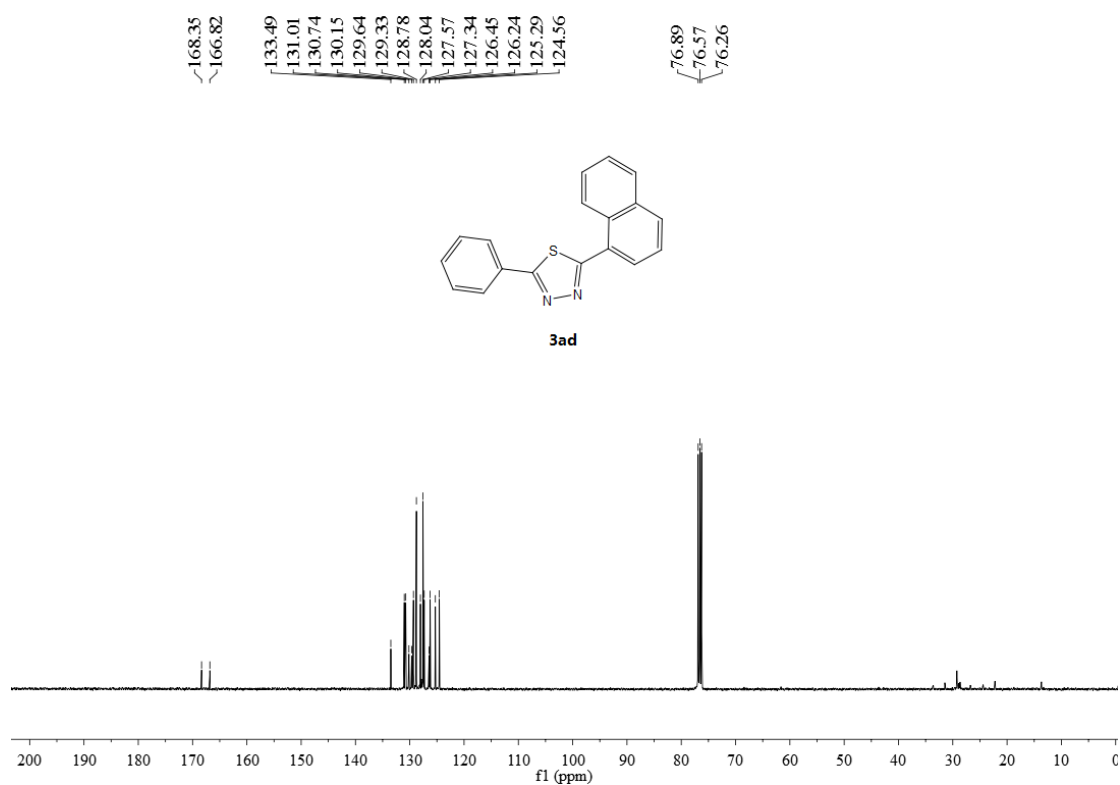

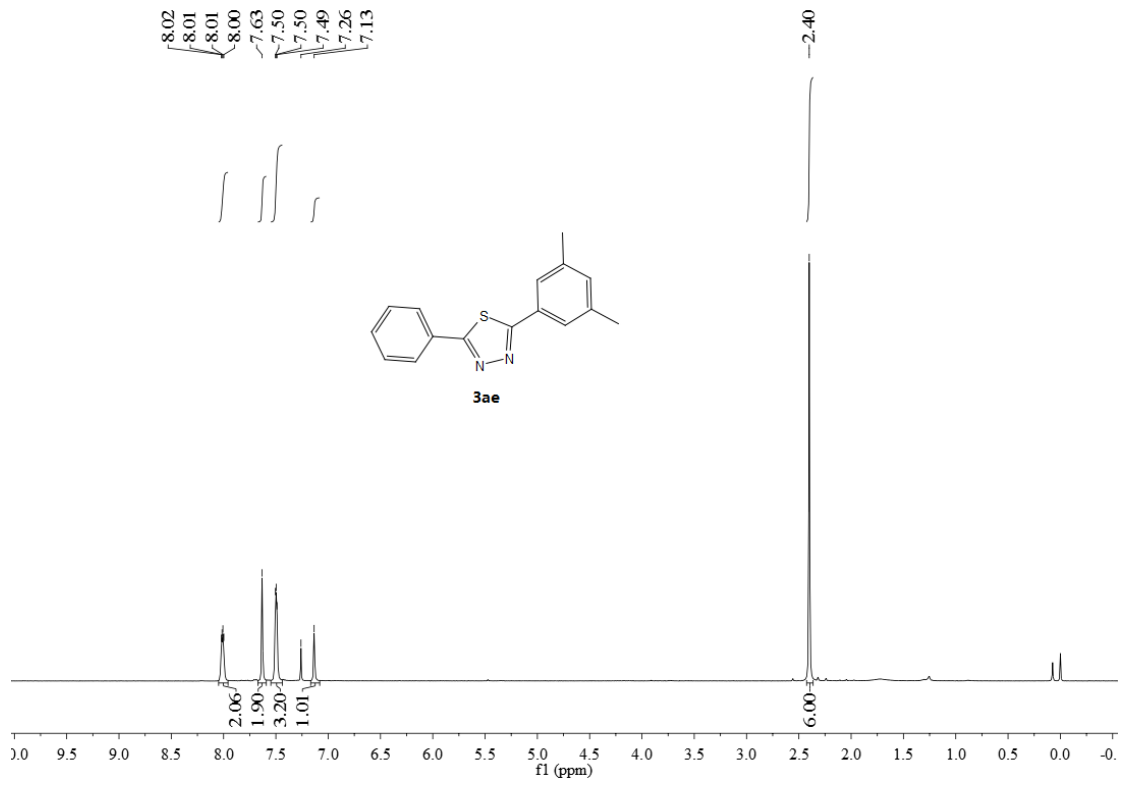

168.62  
168.47  
-160.46

131.70  
131.59  
130.65  
129.62  
128.37  
121.13  
117.95  
112.66

77.78  
77.46  
77.14

-55.94

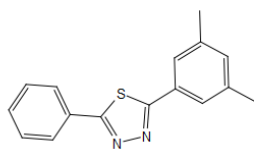

3ae

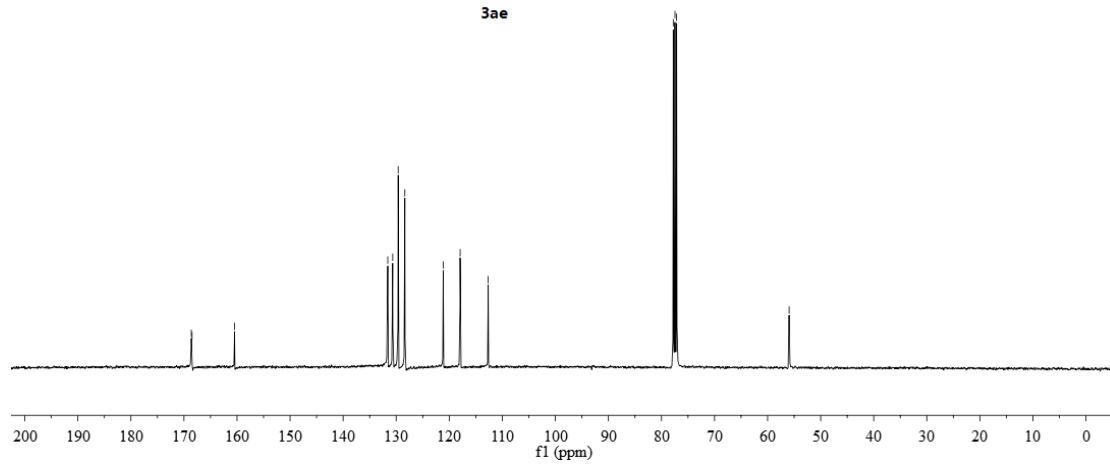

Supplement: c5ob01328c1.pdf [file c5ob01328c1.pdf]
